# Conditional control of fluorescent protein degradation by an auxin-dependent nanobody

Katrin Daniel<sup>1,4</sup>, Jaroslav Icha<sup>2,3,4</sup>, Cindy Horenburg<sup>1</sup>, Doris Müller<sup>1</sup>, Caren Norden<sup>2</sup> and Jörg Mansfeld<sup>1</sup>

<sup>1</sup>Cell Cycle, Biotechnology Center, Technische Universität Dresden, 01307 Dresden, Germany

<sup>2</sup>Max Planck Institute of Molecular Cell Biology and Genetics, 01307 Dresden, Germany

<sup>3</sup> present address: Turku Centre for Biotechnology, University of Turku, FIN-20520 Turku, Finland

<sup>4</sup>These authors contributed equally to this work.

Correspondence should be addressed to J.M. ([joerg.mansfeld@tu-dresden.de](mailto:joerg.mansfeld@tu-dresden.de)) or C.N. ([norden@mpi-cbg.de](mailto:norden@mpi-cbg.de))

## Abstract

The conditional and reversible inactivation of proteins by auxin-mediated degradation is a powerful tool to define protein functions from the cellular to the organismal level. However, its wider applications require fusing the auxin-inducible degron (AID) to individual target proteins. Thus, thus establishing the auxin system for multiple proteins can be challenging. Another approach for directed protein degradation are anti-GFP nanobodies, which can be applied to GFP stock collections that are readily available in different experimental models. Here, we combine the best of auxin and nanobody-based degradation technologies creating an AID-nanobody to degrade GFP-tagged proteins at different cellular structures in a conditional and reversible manner in human cells. We demonstrate efficient and reversible inactivation of the anaphase promoting complex/cyclosome (APC/C) and thus provide new means to study the functions of this essential ubiquitin E3 ligase. Finally, we establish the auxin degradation in a vertebrate model organism by employing AID-nanobodies in zebrafish.

Conditional loss of function studies are fundamental to reveal specific protein functions in complex biological systems. The rapid degradation of proteins fused to an auxin-inducible degron (AID) enables the generation of conditional knockdowns at the protein level<sup>1-4</sup> and thus belongs to the few approaches to determine acute phenotypes in a reversible manner. Degradation requires the ectopic expression of the plant F-Box protein TIR1, which recruits proteins tagged with AID in an auxin-dependent manner to SKP1-CUL1-F-Box (SCF) ubiquitin E3 ligases resulting in their ubiquitylation and proteasomal degradation. A caveat is however the need for genetic engineering as the AID needs to be site-specifically inserted into the alleles of each targeted protein. Further, it has been reported that fusion with the AID degron can destabilize the tagged protein<sup>3-6</sup>. So far, the auxin system has been established in a limited number of case studies including yeast<sup>4,7</sup>, nematodes<sup>8,9</sup>, flies<sup>1-4</sup> and human cell lines<sup>3-6</sup>. However, its feasibility in a vertebrate model organism remains to be shown and large-scale application of the AID system in animal remains challenging despite the advent of CRISPR/Cas9.

deGradFP is an alternative approach to target proteins for degradation<sup>4,7</sup> and takes advantage of genetically encoded nanobodies that can recognize GFP-tagged proteins in living cells<sup>8</sup>. deGradFP employs a fusion of the anti GFP-nanobody vhhGFP4<sup>10</sup> to the F-Box domain of the F-box protein Slimb enabling direct and effective GFP-fusion protein removal in a SCF and proteasome-dependent manner in flies and human cell culture<sup>7</sup>. As the efficiency of deGradFP degradation has been shown to differ between model organisms deGradFP-like approaches that employ distinct degradation domains have been developed in nematodes<sup>11</sup> and zebrafish<sup>12</sup>. One advantage compared to the AID system are stock collections of endogenous proteins tagged with GFP or GFP-like proteins (e.g. YFP, Venus, Citrine), which are recognized by anti-GFP nanobodies. Such collections are readily available in model systems such as flies and zebrafish<sup>13-15</sup> and endogenous GFP-fusions are also increasingly in human cell lines (this study)<sup>16-19</sup>.

Hence, degradation technologies targeting GFP have the potential of a widespread application in a multitude of experimental systems, especially in animal model organisms, due to the possibility to obtain homozygous GFP-traps by breeding. Compared to the AID system however, deGradFP and related nanobody-mediated degradation systems suffer from two key disadvantages. First, the induction of degradation is coupled to the *de novo* expression of the nanobody-Fbox fusion and therefore only provides a rough temporal control. Second, degradation is not reversible as long as the nanobody-degron fusion protein is present, thus precluding experiments that depend on the transient inactivation of the target protein.

We reasoned that merging the two elements that provided reversibility of AID and specificity of nanobody-dependent degradation would mitigate disadvantages of both technologies and provide a potent alternative degradation tool to address biological questions from the cellular to the organismal level. We show that expression of a customized AID-nanobody fusion in combination with TIR1 provides a powerful strategy to reversibly inactivate GFP-tagged proteins localized to distinct cellular structures by ubiquitin-mediated proteolysis in an auxin-dependent manner. Comparing AID-nanobody-mediated degradation with established auxin and deGradFP technologies, we find that successful application and degradation efficiency of each system is context dependent and differs for individual target proteins. By targeting endogenous ANAPC4, an essential subunit of the anaphase promoting complex/cyclosome (APC/C), we provide an example for which only the mAID-nanobody technology enables a reversible functional inactivation of this crucial cell cycle enzyme. Finally, we show that the auxin system can be applied to a vertebrate model organism by demonstrating effective degradation of GFP-tagged proteins by mAID-nanobodies in zebrafish.

## Results

### Development of a lysine-less mAID-nanobody

Protein degradation of GFP-fusion proteins by the auxin-inducible nanobody system (Fig. 1) requires ectopic expression of the plant F-Box protein TIR1 and a GFP nanobody fused to the AID degen. To ensure efficient protein degradation in both, the nucleus and the cytoplasm we first created HeLa and retina pigment epithelial cell lines (hTERT RPE-1) stably expressing TIR1 either tagged with a nuclear localization sequence (NLS) or a nuclear export sequence (NES) (Supplementary Fig. 1a).

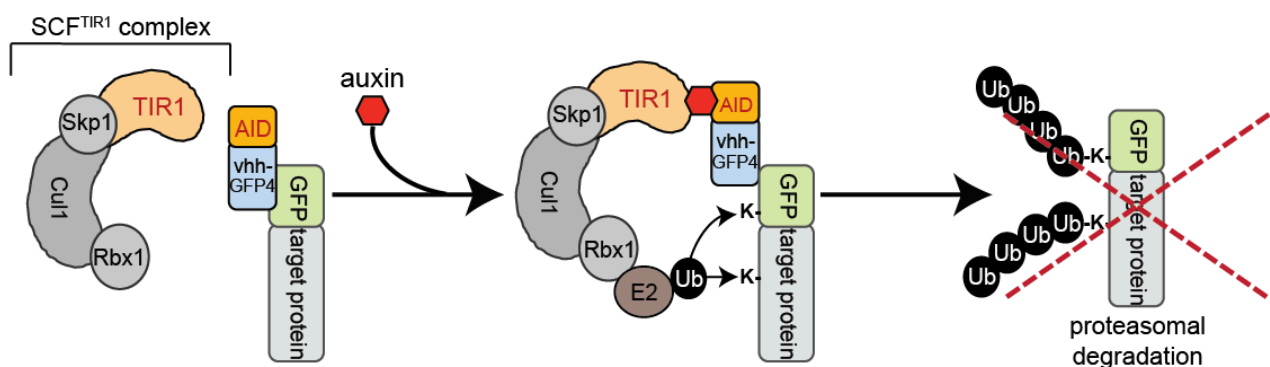

**Figure 1| Auxin-dependent degradation of GFP-tagged proteins by an anti-GFP nanobody.** Schematic illustration of AID-nanobody degradation. GFP-tagged proteins are recognized by an AID-nanobody fusion. Addition of auxin triggers recruitment of the SCF<sup>TIR1</sup> ubiquitin E3 ligase. Ubiquitylation of the GFP fusion protein occurs at lysine residues present in GFP and/or the target protein leading to proteasomal degradation. AID, auxin-inducible degen; Cul1, Cullin-1; Rbx1, RING-box protein 1; Skp1, S-phase kinase-associated protein 1; TIR1, transport inhibitor response 1; vhh-GFP4, anti-GFP nanobody.

To reduce the size of the AID-nanobody fusion, we first explored the potential of single (67 aa) and triple (201 aa) minimized AID (mAID) sequences reported to have a similar or superior efficiency compared to the full length AID<sup>20</sup> (Supplementary Fig. 1b). Monitoring the degradation mAID-Venus reporters after the addition of indole-3-acetic acid (IAA) or the synthetic auxin analog 1-naphthaleneacetic acid (NAA, thereafter generally referred to as auxin), we found no significant difference in the degradation kinetics of either reporter suggesting that a single mAID was sufficient for efficient degradation in human cell lines (data not shown). Of note, triple mAID fused to Venus induced aggregate formation in HeLa and RPE-1 cells (Supplementary Fig. 1c and data not shown) while single did not. Consequently, we fused a single mAID labeled with a hemagglutinin (HA) epitope for detection onto the N-terminus of the anti-GFP nanobody vhhGFP4<sup>7</sup> creating mAID-vhhGFP4 (Supplementary Fig. 1d). To assess the stability of the mAID-nanobody fusion in response to auxin treatment we inserted tetracycline-inducible mAID-vhhGFP into the TIR1 expressing HeLa cell line. Western blot analysis revealed the substantial depletion of mAID-vhhGFP4 in the presence of auxin (Supplementary Fig. 1e), indicating that SCF<sup>TIR1</sup> ubiquitylated mAID-vhhGFP4 on one or several of the lysine residues present in mAID and/or vhhGFP4. We reasoned that replacing all lysine residues present in mAID-vhhGFP4 with structurally related arginine residues that cannot be ubiquitylated could provide a strategy to stabilize the mAID-vhhGFP4 and to direct SCF<sup>TIR1</sup> activity exclusively towards GFP-fusion proteins. To examine if lysine to arginine mutagenesis has a functional impact on the ability of TIR1 to recognize mAID, we first replaced all lysines present in mAID but not in vhhGFP4 (mAID<sup>K→R</sup>-vhhGFP4) (Supplementary Fig. 1d). The lysine-less mAID still supported degradation of the mAID<sup>K→R</sup>-vhhGFP4 presumably due to ubiquitylation of the remaining lysines present in vhhGFP4 (Supplementary Fig. 1e). This finding suggested that lysine to arginine mutagenesis did not impair the recognition of lysine-less mAID by TIR1. Mutagenesis of all lysines in vhhGFP4 considerably stabilized mAID<sup>K→R</sup>-vhhGFP4<sup>K→R</sup> (hereafter generally referred to as mAID-nanobody or mAID-vhhGFP) further (Supplementary Fig. 1e). To assess the functionality of the complete lysine-less mAID-nanobody, we first monitored its ability to degrade the GFP-like protein Venus. Adding auxin to a stable cell line expressing Venus and tetracycline-inducible mAID-nanobody resulted in Venus degradation in an auxin- and proteasome-dependent manner (Fig. 2a, Supplementary Fig. 2a). Degradation of Venus indicated that lysine mutagenesis in vhhGFP4 is not critical for nanobody binding to GFP or GFP-like proteins.

Thus, we conclude that due to its ability to target the sole fluorescent protein, the mAID-nanobody should in principle enable the degradation of any GFP-tagged protein independently of the availability of additional lysine residues present within the target protein.

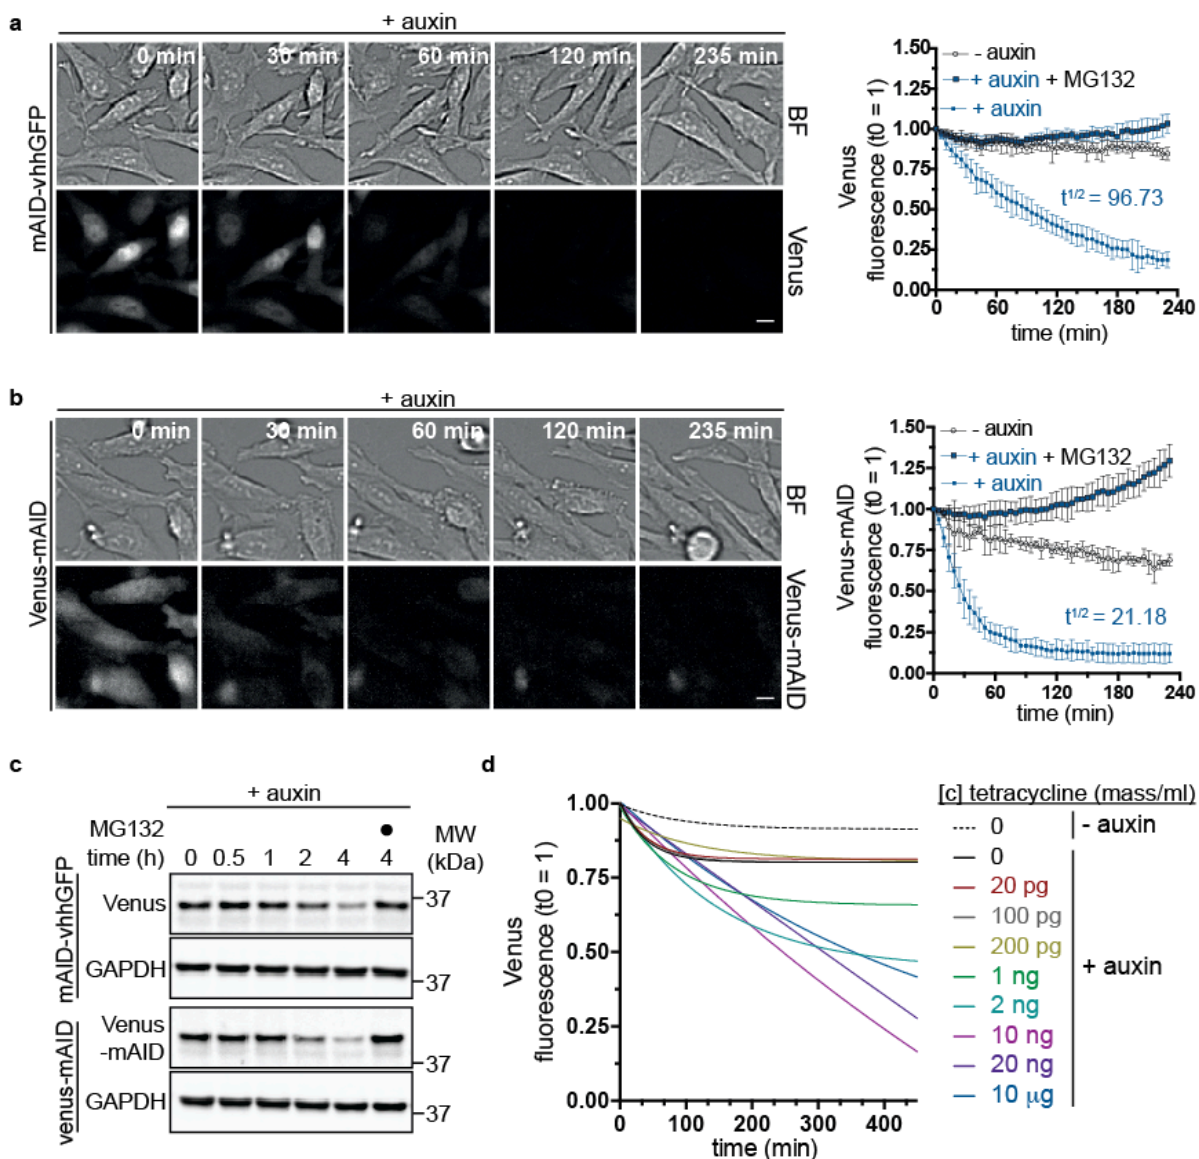

**Figure 2| Kinetics of Venus degradation by mAID-nanobodies. (a)** Time-lapse images and degradation kinetics of Venus targeted by the mAID-nanobody or **(b)** of Venus-AID after the addition of 0.5 mM auxin. Scale bar: 10  $\mu$ m. Quantifications show the mean  $\pm$  s.d. ( $n=5$ , -auxin, +auxin+ MG132;  $n=10$ , +auxin). **(c)** Western blot analyses of cells treated as in (a) and (b) for the indicated time with 0.5 mM auxin or auxin together with 10  $\mu$ M proteasome inhibitor MG132. **(d)** Titration of tetracycline-inducible expression of mAID-nanobodies and the effect on the degradation kinetics of Venus in the presence of 0.5 mM auxin. Note, the 100 pg curve is masked by the 20 pg and 0 pg curves. Quantifications show non-linear fit (one-phase decay) of ( $n=6$ , 0 tetracycline  $\pm$  auxin;  $n=3$ , remaining concentrations). Note, images of - auxin, + auxin and 10  $\mu$ M MG132-treated cells, degradation of Venus by deGradFP, and Western blot detection of mAID-nanobody expression during the titration are shown in Supplementary Fig. 2.

### Kinetics of Venus degradation by mAID-nanobodies

We observed a depletion of Venus by the mAID-nanobody with a half-life of  $\sim$ 97 minutes (Fig. 2a) and were thus interested to see how this relates to degradation kinetics of a direct AID-Venus fusion protein. We fused wildtype mAID to the C terminus of Venus and quantified degradation efficiency by live cell imaging. Compared to degradation by the mAID-nanobody the direct fusion of mAID to Venus (Venus-mAID) resulted in  $\sim$ 4-fold faster

degradation kinetics ( $t^{1/2} = 21.18$  minutes) (Figs. 2a, b, Supplementary Fig. 2a), which was further confirmed by Western blot analysis (Fig. 2c). This difference might reflect the reduced complexity of a 2-component degradation system compared to our 3-component approach. Alternatively, this might be a consequence of the additional lysine residues present in wildtype mAID providing more potential ubiquitylation sites.

Next, we investigated how different expression levels of the mAID-nanobody affect degradation kinetics. Therefore, we titrated mAID-nanobody expression over a 7-fold range in a tetracycline-dependent manner (Fig. 2d, Supplementary Fig. 2b) Time-lapse imaging after auxin addition revealed that differences in the levels of mAID-nanobody only had a minor impact on the efficiency of Venus degradation (Fig. 2d) once the levels of mAID-nanobody and the levels of Venus were in the same range (Fig. 2d, Supplementary Fig. 2b). Levels of mAID-nanobody that were below Venus levels resulted in partial degradation. We observed that at its highest expression the mAID-nanobody slightly slowed Venus degradation kinetics (Fig. 2d, Supplementary Fig. 2b) possibly reflecting that an excess of free mAID-nanobody competes with target-bound nanobodies for binding to SCF<sup>TIR1</sup> (Fig. 2d, Supplementary Fig. 2b).

Taken together, we conclude that the mAID-nanobody robustly targets Venus for degradation when enough nanobody is expressed, albeit at a slower rate than achieved by a direct Venus-mAID fusion. Nevertheless, these results show that our approach can become a powerful tool for the inducible degradation of GFP and GFP-like proteins.

### **Conditional and reversible depletion of GFP-fusion proteins localized to distinct cellular compartments and structures by mAID-nanobodies**

So far, we have shown that the mAID-nanobody enables degradation of the Venus protein, which diffuses freely in the nucleus and cytoplasm. To determine whether mAID-nanobodies are able to also target GFP-fusion proteins present at distinct subcellular locations and to assess if auxin removal allows protein recovery including re-established protein localization, we created three TIR1 cell lines expressing different fluorescent fusion proteins: *(i)* Venus-tagged Lamin A (Venus-LMNA), which assembles into the nuclear lamina, a complex filamentous meshwork beneath inner nuclear membrane (Fig. 3a); *(ii)* Venus-tagged Cyclin D1 (CCND1-Venus), which localizes to both, the cytoplasm and nucleus (Fig. 3b), and *(iii)* GFP-tagged Inner centromere protein INCENP (INCENP-GFP), which localizes to distinct DNA-associated structures (Fig. 3c). As INCENP-GFP was expressed from the endogenous promoter in context of a bacterial artificial chromosome (BAC)<sup>21</sup> we were able to evaluate degradation and recovery in comparison Venus-LMNA and CCND1-Venus constitutively expressed from a CMV promoter.



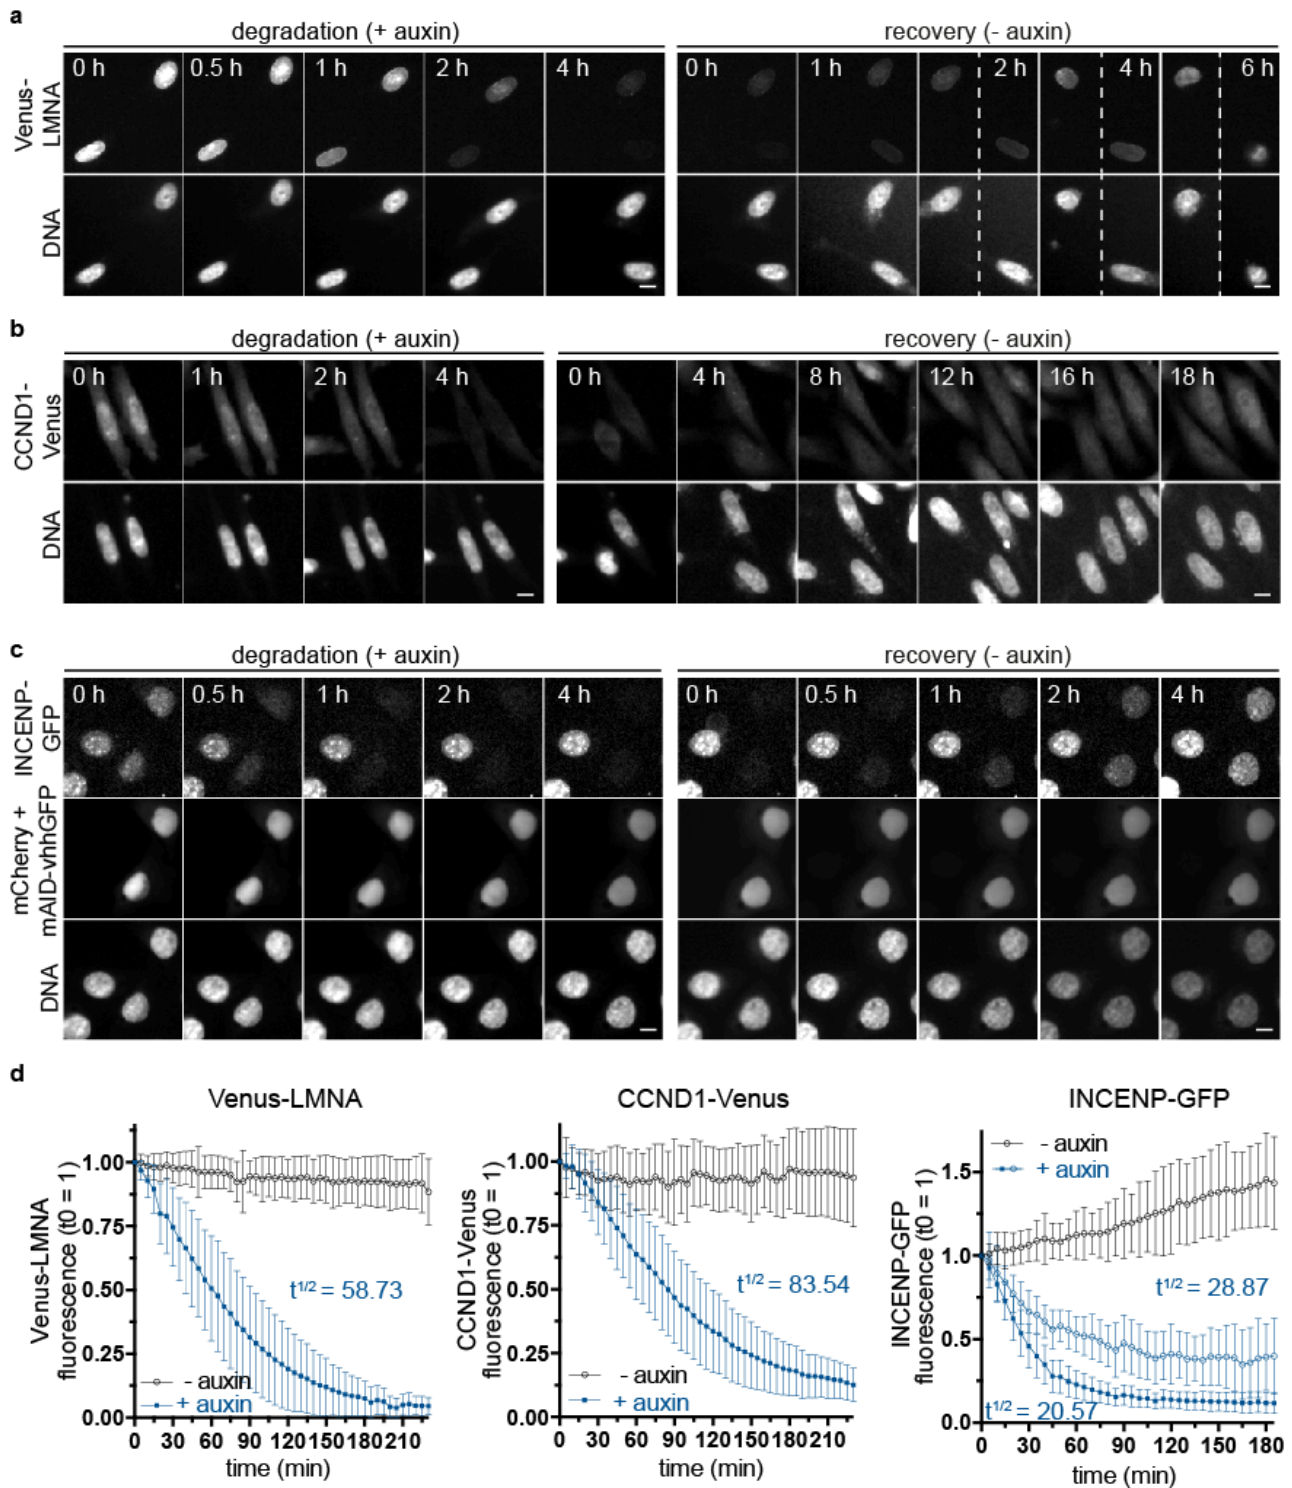

**Figure 3| Conditional and reversible depletion of GFP-fusion proteins localized to distinct cellular compartments and structures by mAID-nanobodies.** (a) Time-lapse images showing the degradation and recovery of (a) nuclear lamina-associated Venus-LMNA and (b) nuclear and cytoplasmic CCND1-Venus in HeLa cell lines expressing tetracycline-inducible mAID-nanobody or (c) the centromere-associated Inner centromere protein (INCENP-GFP) after transient transfection of mAID-nanobody and nuclear mCherry expressed from the same mRNA (mCherry + mAID-VHH, see Methods). (a-c) Degradation and recovery were induced by the addition or removal of 0.5 mM auxin for the indicated time. Scale bar: 10  $\mu$ m. (d) Single cell degradation kinetics of Venus-LMNA, CCND1-Venus and INCENP-GFP from the experiments shown in (a-c). Open blue circles indicate degradation INCENP-GFP cells that reach a plateau at  $\sim$ 50% of the initial fluorescence. Quantifications show the mean  $\pm$  s.d. Venus-LMNA and CCND1-Venus (n=40, -auxin; n=40, + auxin). INCENP-GFP (n=14, -auxin; n=29, + auxin (plateau); n=40, + auxin).

To enable degradation, mAID-nanobody expression was either induced by tetracycline addition (Venus LMNA and CCDN1-Venus) or by transient transfection of a construct expressing the mAID-nanobody and nuclear-localized mCherry as a transfection control from the same mRNA. In all three cases, time-lapse imaging revealed extensive and efficient degradation of the target protein after auxin addition as well as gradual recovery of the proteins following auxin removal (Fig. 3a-c). Quantification of substrate depletion showed that kinetics of auxin-dependent degradation varied among the analyzed target proteins: while CCDN1-Venus was degraded with a half-life of ~84 minutes, 50% depletion of Venus-LMNA required ~59 minutes and only ~21 minutes for INCENP-GFP (Fig. 3d). Of note, in all cases the fusion protein was degraded more efficiently than Venus itself (Fig. 2a), suggesting that additional ubiquitylation sites present in the protein fused to GFP/Venus positively affected degradation kinetics. During degradation of INCENP-GFP we observed a population of cells with incomplete degradation and slower kinetics ( $t^{1/2} = 28.87$  minutes). These might reflect cells in which the transiently expressed nanobody became limiting during the experiment (Fig. 3c, and Fig. 2).

We conclude that mAID-nanobody-mediated degradation can be achieved for GFP-fusion proteins in different cellular compartments. We observed rapid but individually varying degradation kinetics up to the rate observed for Venus-AID (Fig. 2b) or direct substrate-AID fusions in mammalian cells<sup>3</sup>. Importantly, the recovery of all substrates after auxin removal confirmed the reversibility of protein depletion in presence of mAID-nanobodies.

### **mAID-nanobodies allow the rapid but reversible inactivation of the APC/C**

A major potential application for mAID-nanobodies is the conditional and reversible inactivation of endogenous GFP-tagged proteins to reveal acute phenotypes of otherwise essential proteins. In addition, the ability to correlate the degree of depletion and the emerging phenotype in individual cells by microscopy can facilitate analysis of cause-effect relationships. As a proof of principle for the inactivation of an endogenous protein by the mAID-nanobody, we chose ANAPC4 as a target for the following reasons: (i) ANAPC4 is a subunit of the APC/C, which allows assaying recognition by mAID-nanobody even in the context of a large and compact 15-subunit protein complex of 1.5 MDa. (ii) APC/C-dependent destruction of mitotic cyclins A2 (CCNA2) and B1 (CCNB1) is essential for mitotic progression and consequently its efficient inactivation yields an easily detectable mitotic metaphase arrest once cells enter mitosis.

To enable ANAPC4 degradation by mAID-nanobodies, we inserted a 3xFlag-streptavidin binding peptide (SBP)-Venus tag into all alleles of the *ANAPC4* gene in a HeLa cell line stably expressing TIR1 and tetracycline-inducible mAID-nanobody by CRISPR/Cas9-assisted homologous recombination (Supplementary Fig. 3a). Neither, expression of Flag-SBP-Venus-ANAPC4 or TIR1 alone nor of Flag-SBP-Venus-ANAPC4, TIR1 and mAID-nanobody



together caused a growth defect compared to the parent cell line (Supplementary Fig. 3b). Furthermore, the intracellular localization of endogenous Flag-SBP-Venus-ANAPC4 (from here, Venus-ANAPC4) did not differ from the localization of untagged endogenous ANAPC4 (Supplementary Fig. 3c) and Venus-ANAPC4 incorporated equally well as the untagged ANAPC4 into the APC/C (Supplementary Fig. 3d). Together, this indicated that the fusion protein is functional.

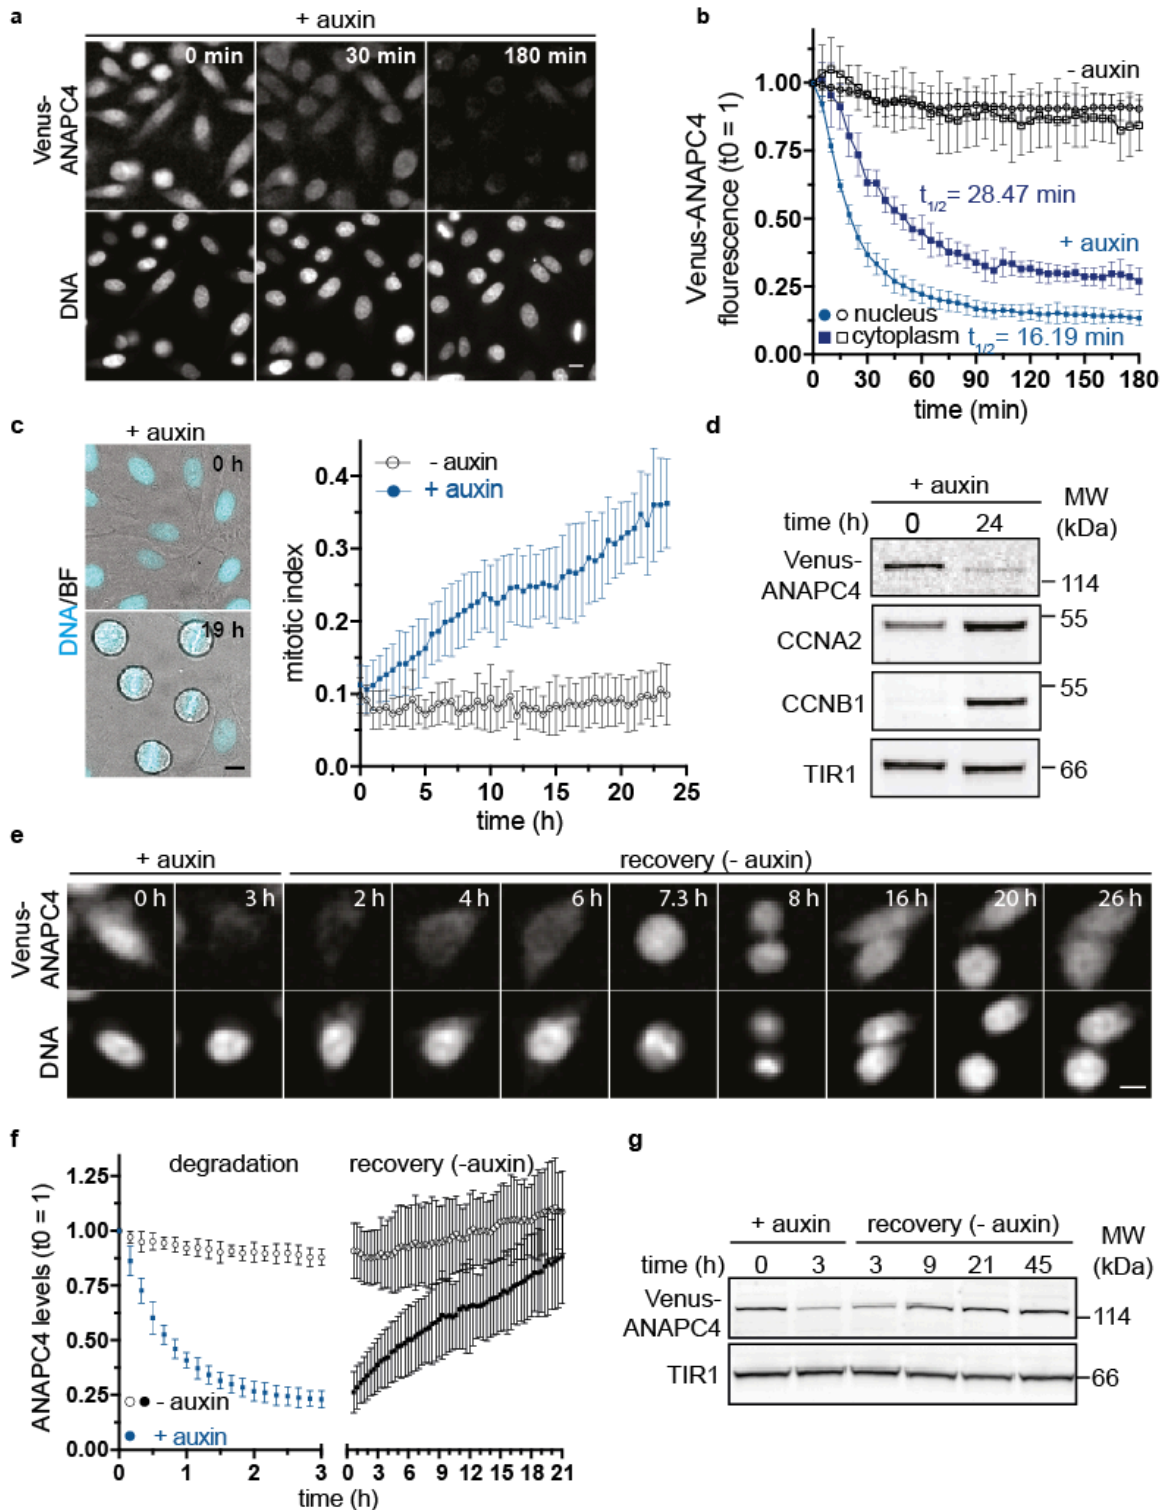

Figure 4| mAID-nanobodies allow the rapid but reversible inactivation of the APC/C.

(legend on next page)

**(a)** Degradation of endogenously tagged Venus-ANAPC4 after the addition of 0.5 mM auxin. Scale bar: 10  $\mu$ m. ANAPC4, APC/C subunit 4. See also Supplementary Fig. 3 for characterization of the ANAPC4 knock in. **(b)** Quantification of Venus-ANAPC4 fluorescence from time-lapse data in (a) showing the kinetics of Venus-ANAPC4 degradation in the nucleus and cytoplasm represented as the mean  $\pm$  s.d. (n=6, all conditions). **(c)** Time-lapse images and quantification of Venus-ANAPC4 cells arresting in mitosis in the presence of 0.5 mM auxin. Data represent the mean  $\pm$  s.d. (n=12, - auxin and + auxin). Scale bar: 10  $\mu$ m. **(d)** Western blot analysis of cells treated with 0.5 mM auxin for the indicated time. Accumulation of cyclins CCNA2 and CCNB1 are indicative of a mitotic arrest. TIR1 serves as a loading control. **(e)** Time-lapse images of Venus-ANAPC4 cells treated for 3 hours with 0.5 mM auxin followed by auxin removal and 26 hours of recovery. Note, Venus-ANAPC4 recovery after 7.3 hours is sufficient to allow mitotic progression. Scale bar: 10  $\mu$ m. **(f)** Quantification of Venus-ANAPC4 recovery from cells treated as in (e) represented as mean  $\pm$  s.d. (n=18, -auxin; n=39, + auxin). Scale bar: 10  $\mu$ m. **(g)** Western blot analysis of cells treated as in (e), TIR1 serves as a loading control.

Quantitative spatio-temporal analysis of Venus-ANAPC4 levels in single cells monitored over 3 hours after auxin supply showed efficient depletion of the protein (Fig. 4a and Supplementary Movie 1). With a half-life of  $\sim$ 16 minutes, degradation in the nucleus was slightly more efficient than in the cytoplasm (28 minutes) (Fig. 4b). Quantitative Western blot analysis confirmed the degradation kinetics established by live cell imaging (Supplementary Fig. 3e, f) and suggested that degradation indeed removed the entire protein as judged by anti-ANAPC4 or anti-GFP detection (Supplementary Fig. 3g). Depleting Venus-ANAPC4 for 3 hours partially affected the protein levels of ANAPC2, ANAPC10 and ANAPC11, whereas the protein levels of all other tested APC/C subunits remained largely unchanged (Supplementary Fig. 3h). Judging APC/C overall integrity after Venus-ANAPC4 depletion by immunoprecipitating the unaffected ANAPC3 subunit indicated that removal of ANAPC4 caused a partial disassembly of the holoenzyme (Supplementary Fig. 3i). The observed decrease in protein levels of some APC/C subunits might reflect a reduced protein stability, which can be observed after disrupting the integrity of large molecular assemblies<sup>22,23</sup>. However, we cannot exclude that the SCF<sup>TIR1</sup> ubiquitylated in addition to ANAPC4 also neighboring APC/C subunits.

To investigate whether the degree of ANAPC4 depletion was sufficient to interfere with APC/C function, we monitored the accumulation of mitotic cells in asynchronously growing cells for 24h. In agreement with a strongly prolonged duration of mitosis (Supplementary Fig. 3j), we observed an increasing number of cells that were arrested at metaphase (Fig. 4c). In addition, we noted elevated protein levels of mitotic cyclins CCNB1 and CCNA2 indicative of a mitotic arrest (Fig. 4d). Thus, the degradation of Venus-ANAPC4 by the mAID-nanobody was efficient enough to abrogate the main function of the APC/C.

Finally, we assessed if removal of auxin allowed Venus-ANAPC4 recovery and functional reconstitution of APC/C. Indeed, already 8 hours after auxin removal Venus-ANAPC4 levels recovered sufficiently to allow progression through mitosis (Fig. 4e) and pre-treatment Venus-ANAPC4 levels were reached after prolonged recovery (Fig.

4f, g). Notably, ANAPC4 recovery was slower compared to INCENP and LMNA and CCND1 (Fig. 3), likely reflecting differences in transcriptional, translational regulation or folding of the protein.

We conclude that functional recovery of proteins after mAID-nanobody depletion is possible also for components of multi subunit protein complexes that partially disintegrate upon target protein depletion.

### **Degradation of endogenous ANAPC4 by mAID-nanobodies in comparison with AID and deGradFP systems**

A direct fusion of mAID to Venus enabled faster degradation kinetics than using the mAID-nanobody in context of Venus alone (Fig. 2). However, monitoring the degradation of fluorescent fusion proteins revealed that mAID-nanobodies can achieve similar degradation rates (Figs. 3 and 4). To directly compare the degradation potential of mAID-nanobodies to a direct mAID-fusion in a biological relevant context we assessed Venus-ANAPC4 depletion and functional inactivation of the APC/C. We generated an endogenous mAID-Venus-ANAPC4 fusion in a cell line stably expressing TIR1 by CRISPR/Cas9-assisted homologous recombination (Supplementary Fig. 4a, Supplementary Material and Methods). Western blot analysis of total cell lysates confirmed the expression of mAID-Venus-ANAPC4 (Supplementary Fig. 4b) and immunoprecipitation with anti ANAPC3 antibodies indicated that the fusion protein incorporated similarly well as untagged ANAPC4 into the APC/C (Supplementary Fig. 4c). Of note, we observed mild differences in the expression level and intracellular localization of mAID-Venus-ANAPC4. Compared to Venus-ANAPC4 and untagged ANAPC4, mAID-Venus-ANAPC4 was stronger expressed and more prominently localized to the cytoplasm (Supplementary Figs. 4d and 3c). It is unlikely that this is due to the molecular size of the epitope tag on ANAPC4 because the mAID-Venus tag contains only four additional amino acids compared to the Flag-SBP-Venus tag. Indeed, Flag-SBP-Venus-ANAPC4 and mAID-Venus-ANAPC4 exhibited an almost identical migration behavior in SDS-PAGE as determined by Western blot analysis (Supplementary Fig. 4b). Since, mAID-Venus-ANAPC4 properly incorporated into the APC/C and we did not observe growth defects during two months of cell culture (data not shown) nor a consistent increase in the duration of mitosis (Supplementary Fig. 4e), we conclude that AID-Venus-ANAPC4 cells are suitable to compare the ability of mAID to degrade ANAPC4 and inactivate the APC/C side by side with mAID-nanobody. In addition, we aimed to assess how the mAID-nanobody approach relates to deGradFP as an alternative nanobody degradation technology. To this end, we created isogenic tetracycline-inducible cell lines expressing deGradFP or deGradFP<sup>Fbox</sup> as a negative control in the background of the endogenous Venus-ANAPC4 expressing cell line described above.

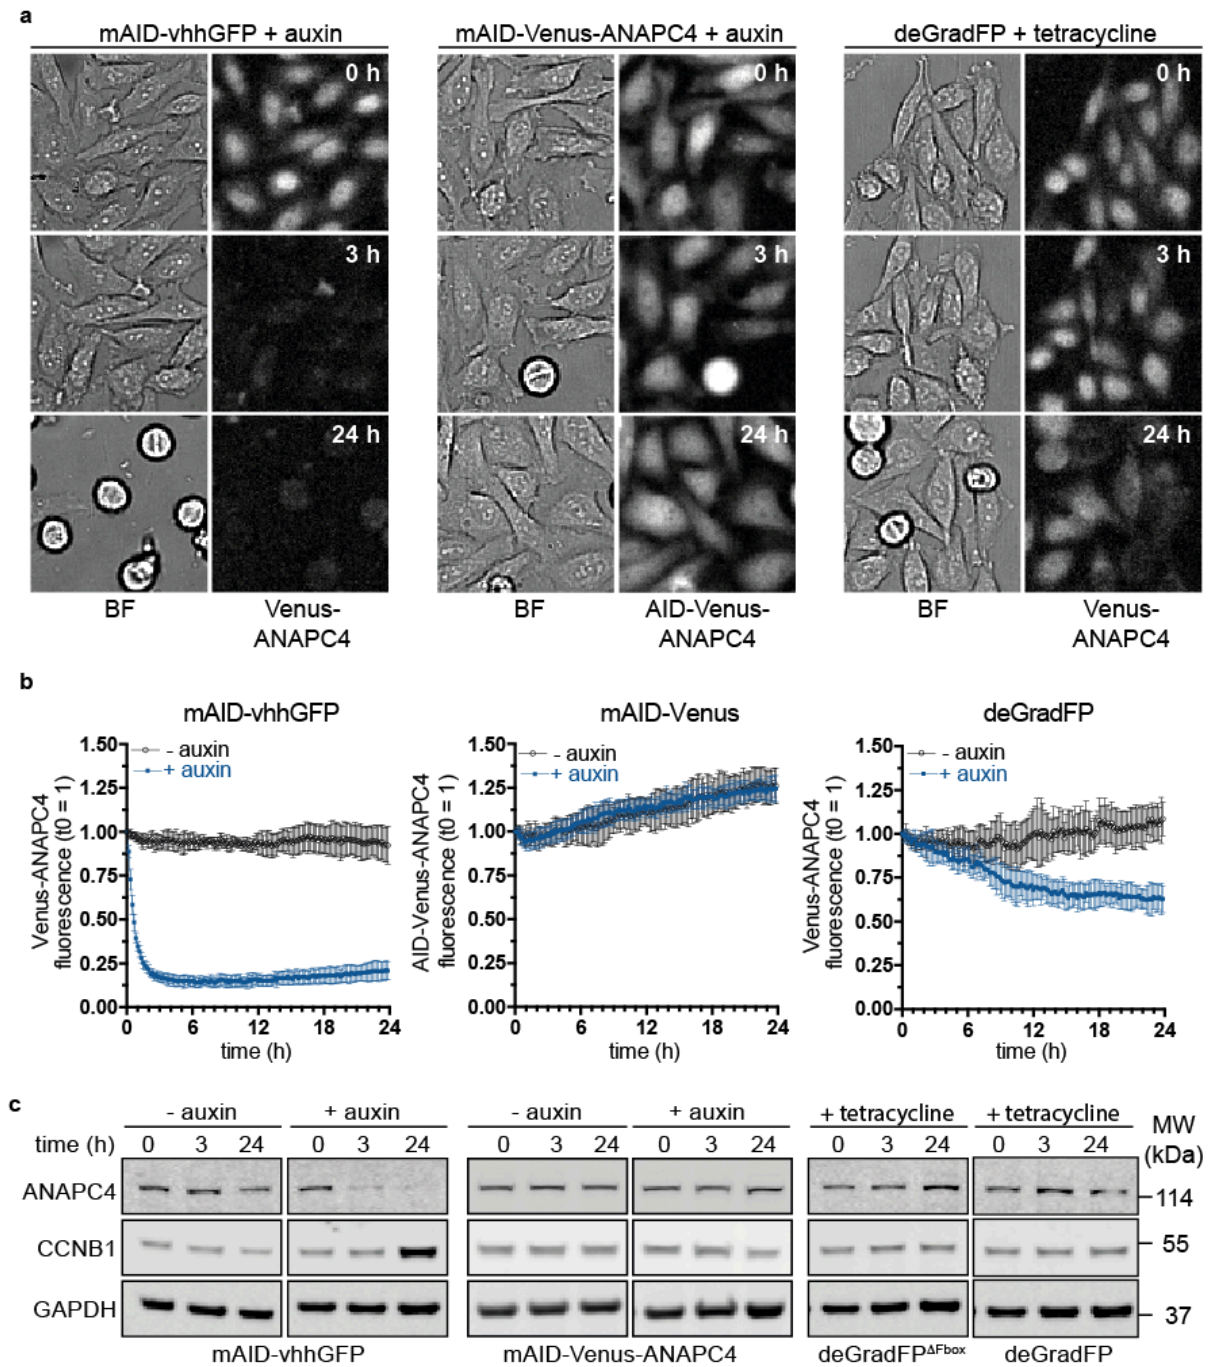

**Figure 5 | Degradation of endogenous ANAPC4 by mAID-nanobodies in comparison with AID and deGradFP systems.** **(a)** Time-lapse images showing the degradation of endogenously tagged Venus-ANAPC4 and mAID-Venus-ANAPC4, respectively, in response to the addition of 0.5 mM auxin for mAID-nanobodies and AID-Venus-ANAPC4 or 1  $\mu$ g/ml tetracycline to induce deGradFP expression. **(b)** Degradation kinetics of the time-lapse data shown in (a) represented as the mean  $\pm$  s.d. for mAID-vhhGFP (n=9, - auxin; n=16, + auxin), mAID-Venus-ANAPC4 (n=12, - auxin; n=20, + auxin), and deGradFP (n=8, - tetracycline; n=11 + tetracycline). **(c)** Western blot analysis of cells treated as in (a) for the indicated time. Increased levels of CCNB1 are indicative of a mitotic arrest and thus functional inactivation of the APC/C. See also Supplementary Fig. 4 for characterization of the mAID-Venus-ANAPC4 knock in, the effect of prolonged expression of deGradFP on Venus-ANAPC4 and CCNB1 levels, and Venus-ANAPC4 fluorescence in response to expressing deGradFP and deGradFP<sup>Fbox</sup>.

To assess the efficiency of all three systems, we simultaneously monitored Venus-ANAPC4 and mAID-Venus-ANAPC4 fluorescence in single cells by time-lapse microscopy for 24 hours, either after the addition of auxin (mAID-nanobody and mAID-Venus-ANAPC4) or after tetracycline-induced deGradFP expression. As previously observed, Venus-ANAPC4 was efficiently targeted for degradation by the mAID-nanobody within 3 hours of auxin addition (Fig. 5a). At this time point neither cells with mAID-Venus-ANAPC4 nor cells with Venus-ANAPC4 targeted by deGradFP showed a decrease in the fluorescence signal (Fig. 5a). Even 24 hours after induction of degradation, no decrease of mAID-Venus-ANAPC4, both by live cell imaging and by Western blot analysis of ANAPC4 levels in total cell lysates was observed (Fig. 5b, c). In contrast, expression of deGradFP but not of deGradFP<sup>ΔFbox</sup> reduced Venus-ANAPC4 fluorescence by only ~25% (Fig. 5b and Supplementary Fig. 5a, b). The lower degradation efficacy of deGradFP might be a consequence of the additional time required for expression and folding of the deGradFP protein. Nevertheless, prolonged induction of deGradFP for up to 48 hours did not decrease Venus-ANAPC4 levels further or lead to CCNB1 accumulation (Supplementary Fig. 5c). Reflecting the degree of ANAPC4 depletion only our mAID-nanobody approach resulted in accumulation of CCNB1 after 24 hours indicative of a functional inactivation of the APC/C (Fig. 5c).

We conclude that at least in the here presented context the mAID-nanobody is the method of choice to allow the rapid degradation of fluorescently-tagged ANAPC4 and thus efficient APC/C inactivation.

### **Auxin-dependent degradation of GFP-tagged proteins by mAID-nanobodies in zebrafish**

Finally, we assessed whether auxin-mediated degradation by the mAID-nanobody is also effective beyond human cell lines. We chose zebrafish as a vertebrate organism, since it is an outstanding animal model for time-lapse imaging approaches and thus would especially benefit from a traceable and reversible protein degradation approach. Previously, anti-GFP nanobody<sup>12</sup> and HaloTag<sup>24</sup> degradation systems were used in zebrafish, however inducible and reversible knockdown strategies are still in their infancies. We first established the concentration of IAA zebrafish embryos tolerated during development. Whereas application of IAA up to 2 mM did not result in any visible developmental defects addition of 5 mM IAA slightly delayed development (Supplementary Fig. 6a). Consistent with previous studies in other model organisms<sup>2,9</sup>, we therefore used 0.5 mM IAA or 0.5 mM NAA for all subsequent experiments. To assess if auxin-based protein degradation with the mAID-nanobody is possible in zebrafish, we first used a transgenic line expressing proliferative cell nuclear antigen tagged with GFP (GFP-PCNA). We provided the degradation system by injecting a mix of RNAs expressing mAID-nanobody, TIR1 and the transfection control H2B-RFP into embryos in a mosaic fashion. We added 0.5 mM IAA at 4-5 hpf and monitored GFP-PCNA degradation in retinal neuroepithelium (Fig. 6a).



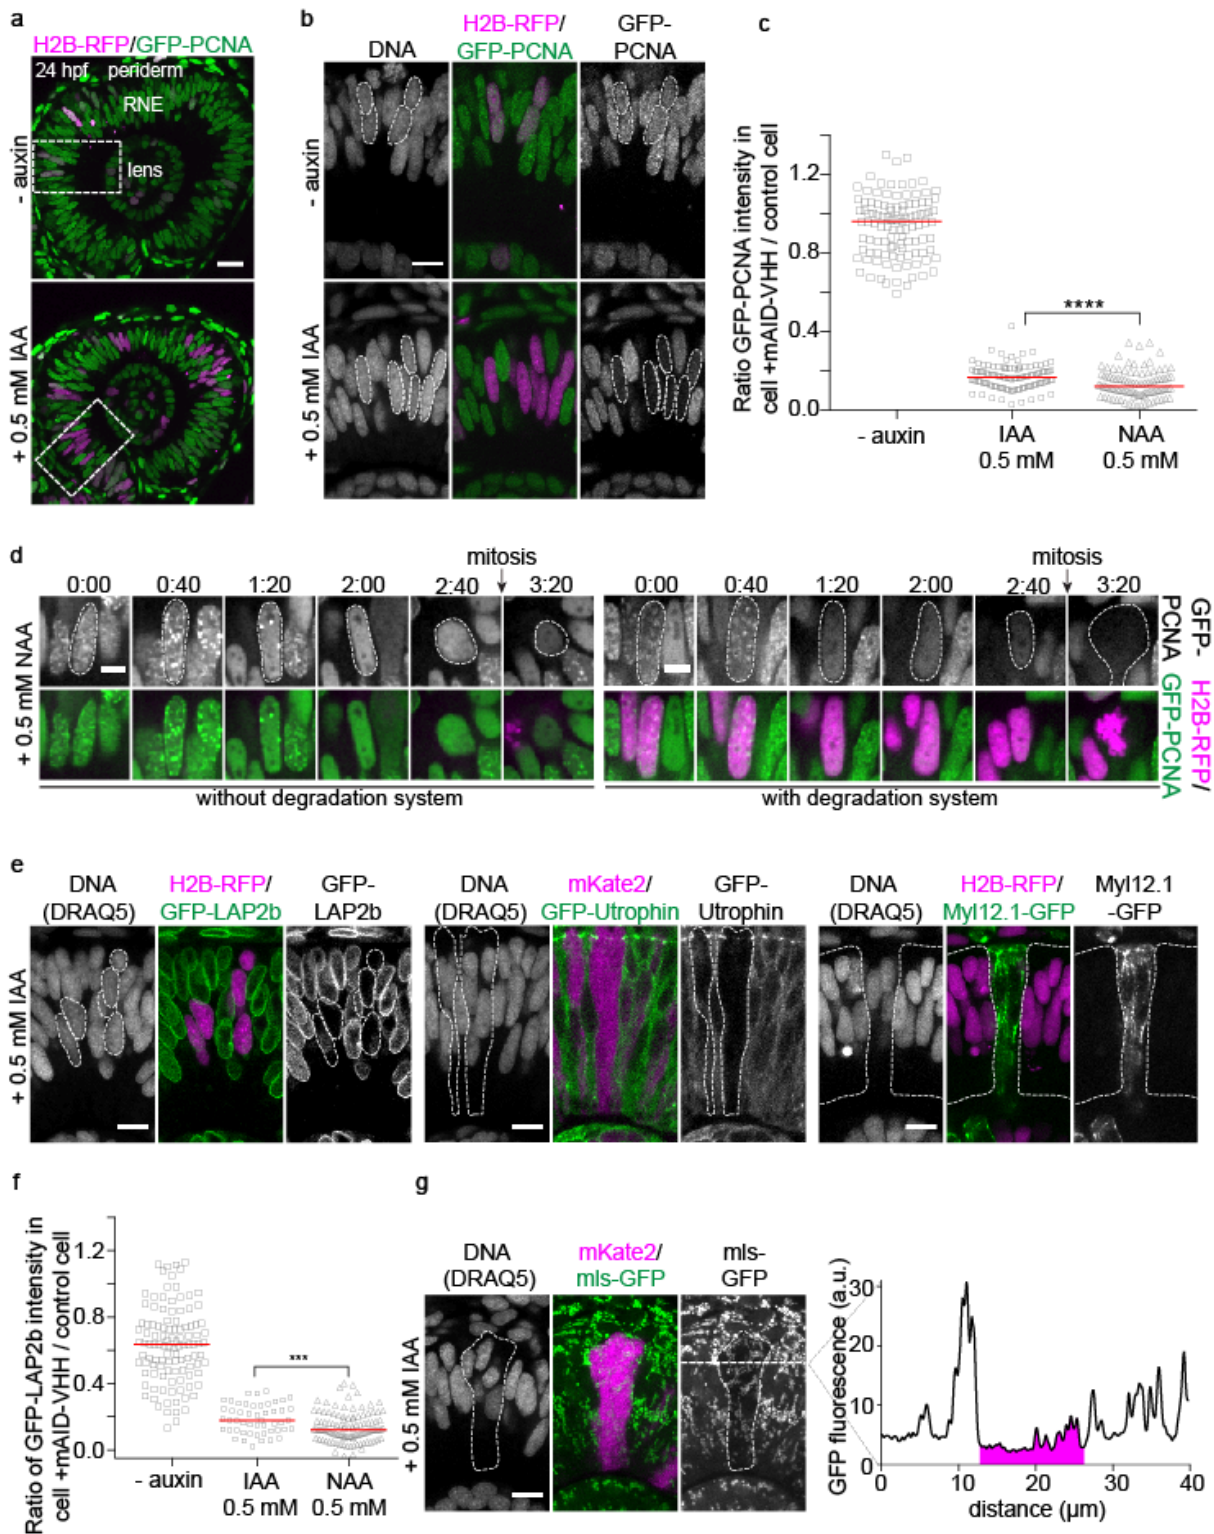

**Figure 6| Auxin-dependent degradation of GFP-tagged proteins by mAID-nanobodies in zebrafish. (a)** Eye of a 24 hpf zebrafish embryo in *Tg(bactin:GFP-PCNA)* mosaically injected with RNAs of TIR1, mAID-nanobody and H2B-RFP RNA to visualize affected cells. The dashed box shows the area displayed in (b). RNE, retinal neuroepithelium. Scale bar: 20  $\mu$ m. **(b)** GFP-PCNA degradation in the presence of IAA. Dashed line: Nuclei of cells expressing the degradation system. Scale bar: 10  $\mu$ m. **(c)** Comparison of GFP-PCNA degradation at 22 hpf in response to IAA and NAA treatment. 1 represents no degradation and 0 represents complete degradation. Bars represent median from two experiments, - auxin control (n=11, 110 cells), IAA (n=11, 108 cells), NAA (n=11, 108 cells). Significance according to a two-tailed Mann-Whitney test ( $p=1.5 \times 10^{-5}$ ).

(continued on next page)

**(d)** Time-lapse imaging of GFP-PCNA degradation in response to NAA in cells without (H2B-RFP negative, left panel) and with degradation system (H2B-RFP positive, right panel). Scale bar: 5  $\mu$ m. **(e)** Degradation of GFP-fusion proteins localized to different cellular structures. Nuclear membrane-localized Lamina-associated polypeptide 2 *Tg(bactin:GFP-LAP2b)*, filamentous actin binding Utrophin fragment *Tg(bactin:GFP-Utrophin)* and actomyosin-associated non-muscle myosin II light chain *Tg(bactin:Myl12.1-GFP)*. Cells containing the degradation system were visualized by cytoplasmic H2B-RFP or cytoplasmic mKate2 RNA co-injection. Scale bar: 10  $\mu$ m. **(f)** Comparison of GFP-LAP2b degradation in response to IAA and NAA treatment as in (c). Bars represent median, - auxin control (n=11, 110 cells), IAA (n=5, 50 cells), NAA (n=11, 111 cells). Significance according to a two-tailed Mann-Whitney test (p=0.0009). **(g)** Depletion of GFP from mitochondria, *Tg(Eef1a1:mls-GFP)*. Cells containing the degradation system show cytoplasmic mKate2 signal. GFP intensity profile along dashed line is plotted, magenta corresponds to the degradation area. Scale bar: 10  $\mu$ m.

GFP-PCNA was robustly degraded at 22 hours post fertilization (hpf) to less than 20% of its original levels, while only negligible protein degradation occurred in the absence of IAA (Figs. 6b). In case of NAA, we observed even more robust degradation of GFP-PCNA to just 12% of its original levels (Fig. 6c), suggesting NAA as the preferred molecule for triggering the TIR1–AID interaction in zebrafish. Next, we tested the kinetics of GFP-PCNA degradation in the zebrafish system by adding NAA to embryos at 22 hpf and followed the GFP fluorescence by time-lapse imaging in S phase cells with and without the degradation system (Fig. 6d). A decrease in GFP signal was apparent from 60 min after NAA addition and after 3 hours GFP-PCNA reached low levels that were comparable to long-term incubation of embryos with IAA or NAA for 18 hours (Fig. 6b-d). We observed some differences in degradation efficacy among cells (Fig. 6d and Supplementary Fig. 6b) most likely reflecting that differing amounts of RNAs are present in individual cells due to differential distribution upon cell division.

To investigate if degradation is also possible in other cellular compartments, we used transgenic lines expressing GFP fused to *(i)*, the Lamina-associated polypeptide 2 (GFP-LAP2b), an inner nuclear membrane protein; *(ii)* GFP-Utrophin, an F-actin binding probe that is recruited predominantly to the cell cortex and *(iii)*, Myosin, light chain 12, genome duplicate 1-GFP (Myl12.1-GFP), a light chain of non-muscle myosin II that colocalizes with actin filaments in the cytoplasm. In all cases, adding IAA resulted in robust protein degradation (Fig. 6e). Quantification of GFP-LAP2b reiterated that NAA was more potent than IAA for protein depletion in the zebrafish (Fig. 6f). Finally, we wondered whether GFP-tagged proteins could be recognized by the AID-nanobody during or shortly after translation. Thus, we tested whether proteins localized to compartments without SCF<sup>TIR1</sup> and proteasomal activity such as mitochondria might be subject to mAID-nanobody-driven protein depletion using a zebrafish line expressing GFP fused to a mitochondrial matrix localization sequence (mls-GFP). Indeed, we observed a reduction of GFP fluorescence (Fig. 6g) suggesting that mls-GFP is targeted for degradation immediately after translation and before it is translocated into mitochondria. Since mls does not contain any

lysine residues, this result underlines that mAID-nanobodies allow GFP-fusion protein degradation exclusively based on GFP.

Taken together, we demonstrate that the auxin system can be applied to a vertebrate model organism thus is applicable beyond human cell lines. By using zebrafish as a proof of principle, we show that the mAID-nanobody can target GFP-tagged proteins localized to different subcellular structures for degradation.

## Discussion

Instant but reversible inactivation of proteins is key to reveal acute phenotypes that otherwise might be masked by compensation or a dominant terminal phenotype. This holds especially true for proteins or protein complexes such as the APC/C that are essential for proliferation but fulfill beyond this canonical role additional crucial functions, i.e. during development or in quiescent and post-mitotic cells<sup>25-27</sup>. Therefore, several strategies have been developed that employ the ubiquitin proteasome system present in all eukaryotic cells to target proteins for degradation, either by the addition of cell-permeable molecules<sup>2,4,28</sup>, the expression of genetically encoded nanobodies<sup>7,11,12,29</sup> or more recently, by the injection of antibodies into human cells or mouse oocytes<sup>23</sup>. All of these approaches have their own advantages and disadvantages and their successful application depends on the targeted protein(s) and the experimental model of choice.

Here, we present a mAID-nanobody to degrade GFP-tagged proteins that combines advantages of existing auxin and nanobody-based technologies. Utilizing SCF<sup>TIR1</sup>, the mAID-nanobody employs the same intracellular degradation machinery established by the classical auxin system and thus shares its key features<sup>2,3</sup>: (i) Robust conditional and rapid degradation of proteins localized to distinct compartments and subcellular cellular structures including chromatin, the nuclear envelope, the cortex and cytoplasmic actin filaments (Figs. 2-4 and 6), (ii) depletion of membrane proteins and proteins in context of large macromolecular assemblies such as the nuclear lamina or the APC/C (Figs. 3, 4 and 6), (iii) reversibility after auxin removal and functional recovery of the targeted protein (Figs. 3 and 4), and (iv) applicability in human tissue or cell culture and a model organism (Figs. 2-6).

By directing SCF<sup>TIR</sup> activity towards the GFP, the mAID-nanobody in principle can target any protein for degradation regardless of their sequence, size and structure. Even a protein localized to a compartment with no SCF activity such as mitochondria can be degraded (Fig. 6) presumably by co-translationally binding of the mAID-nanobody to the target once the GFP epitope is folded. Finally, as the AID degron is provided *in trans* by the nanobody our technology does not require time-consuming fusion of AID degrons to the protein(s) of choice.

Thereby, mAID-nanobodies can take advantage of GFP stock collections that exist for several model organisms and increasingly also for cell culture models<sup>16-18</sup>.

Degradation of the model substrate Venus indicated that the classical auxin system enables faster degradation kinetics than the mAID-nanobody (Fig. 2). In the context of more biological relevant fusion proteins, mAID-nanobody depletion achieved half-lives ranging from ~16-83 minutes (Figs. 3 and 4), which we expect to be suitable for most experimental designs. Providing the mAID *in trans* to the nanobody might have benefits over a direct fusion of the degron sequence to the target protein in certain cases. First, adjusting the expression level of the mAID-nanobody provides additional means to control the extent of substrate degradation. Significantly lower levels of mAID-nanobody than the target partially decreased Venus expression to a steady level that was maintained for at least 7 hours after auxin addition (Fig. 2). This feature might facilitate establishing thresholds at which the concentration of the target protein becomes limiting for a specific biological function. Second, previous studies raised concerns that AID fusion can destabilize substrate proteins<sup>4</sup>, and we observed that fusing mAID to Venus or Venus-ANAPC4 partially altered the localization of the fusion protein. Although adding the mAID degron to Venus is not predicted to hinder free diffusion of the 37kDa fusion protein through nuclear pore complexes<sup>29</sup>, mAID-Venus was more pronouncedly localized to the cytoplasm than Venus (Fig. 2). Similarly, mAID-Venus-ANAPC4 was enriched in the cytoplasm compared to Venus-ANAPC4 and untagged ANAPC4 (Figs. 4 and 5, Supplementary Figs. 3 and 4). In contrast, the presence of the mAID-nanobody had neither an effect on Venus nor on Venus-ANAPC4 (Figs. 2 and 4).

Compared to existing anti-GFP nanobody degradation strategies based on deGradFP<sup>7,11,12</sup>, the major advantage of the mAID-nanobody is the ability to rapidly induce the degradation of the target protein but also to allow recovery after auxin removal. Further, the stabilization of the mAID-nanobody by lysine mutagenesis ensures that the amount of nanobody does not become limiting as it is the case for antibody-based degradation<sup>23</sup>. By virtue of endogenous Venus-ANAPC4, we show that mAID-nanobodies rapidly decrease Venus-ANAPC4 levels to an extent that causes a pronounced mitotic arrest. In contrast, even extended expression of deGradFP did not reduce Venus-ANAPC4 levels by more than 25% and failed to cause a mitotic phenotype (Fig. 5). As Venus-ANAPC4 is part of a large macromolecular complex, binding of the 26 kDa mAID-nanobody to Venus to recruit the SCF might be sterically beneficial for ubiquitylation and degradation than binding of the slightly larger deGradFP (37 kDa).

By establishing mAID-nanobody degradation in zebrafish we demonstrate that the auxin system can be applied to a complex vertebrate model organism. As observed in human cells efficient degradation in zebrafish might require optimization of mAID-nanobody expression in respect to the abundance of targeted protein, which could

be easily achieved by injecting different amounts of RNA. Because injected RNAs are getting depleted during animal development RNA-based delivery of the mAID-nanobody system is restricted in time. In the retina we have observed efficient degradation up to 26 hours post injection. Creation of a transgenic line expressing TIR1 and an ideally conditionally inducible mAID-nanobody would greatly augment applications in zebrafish and other animal models. Since the auxin system has been established in yeast<sup>2,4</sup>, flies<sup>1</sup> and nematodes<sup>9</sup>, we predict that mAID-nanobody technology can readily be implemented in a wide range of animal models.

In summary, we present an approach in which ectopic expression of TIR1 and a customized mAID-vhhGFP fusion provide a powerful strategy for the conditional and reversible degradation of potentially any GFP/GFP-like fusion protein. mAID-nanobodies enable loss of function studies of endogenous GFP-tagged proteins and thus are especially attractive to animal models where GFP-trap stock collections exist and homozygosity of alleles can be easily achieved by breeding. Facilitated by advances in genome engineering, the number of endogenously GFP-tagged lines in different model organisms and in human cell culture models will only increase in the future. mAID-nanobody degradation may also be applied to overexpressed GFP-fusions and genome-wide GFP BAC (bacterial artificial chromosome) libraries<sup>21,30</sup>, e.g. to inactivate dominant negative mutants or study translation kinetics after reversible depletion of the transgene. Because knockouts are comparably easier to obtain than knock-in's, the existing GFP BAC libraries in human cells provide an additional resource for loss of function studies by mAID-nanobodies, given that endogenous alleles are ablated by CRISPR/Cas9 or alternative methods.

Notably, our approach is not restricted to GFP and GFP-like proteins as nanobodies recognizing other fluorescent proteins are available<sup>31</sup>. Finally, we present a rationale of how nanobodies in general can mediate ligand-inducible protein interactions without the need of genetically modifying the target of interest, thereby enabling applications beyond auxin-dependent protein degradation.



## Supplementary figures and legends

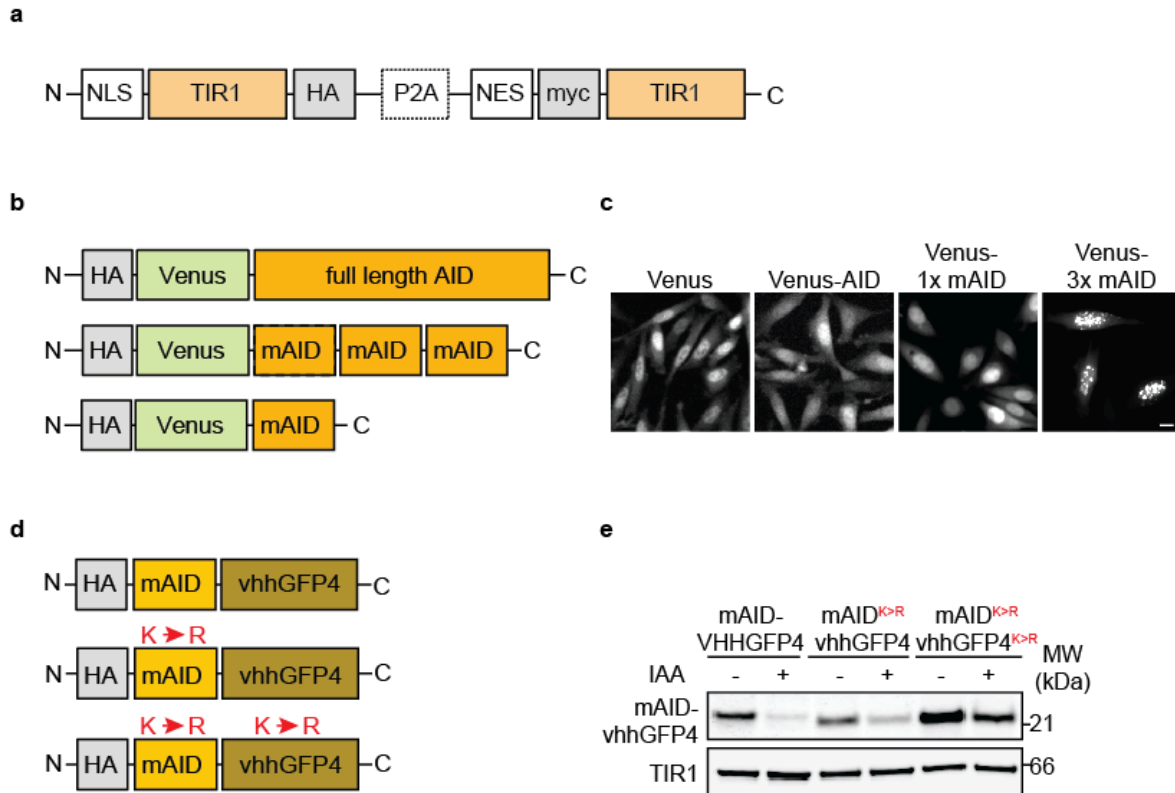

### Supplementary Figure 1| Development of a lysine-less mAID-nanobody to target GFP and GFP-like proteins through the auxin system.

**(a)** Schematic representation of the TIR1 construct. **(b)** Schematic representation of full length AID, triple mAID and single mAID reporters and **(c)** their localization in living HeLa cells. Scale bar 10  $\mu$ m. **(d)** Schematic representation of wildtype and lysine-less mAID-nanobody constructs. **(e)** Western blot analysis of HeLa cells expressing mAID-nanobody constructs illustrated in (d) with or without treatment with 0.5 mM IAA for 180 minutes. TIR1 serves as a loading control.

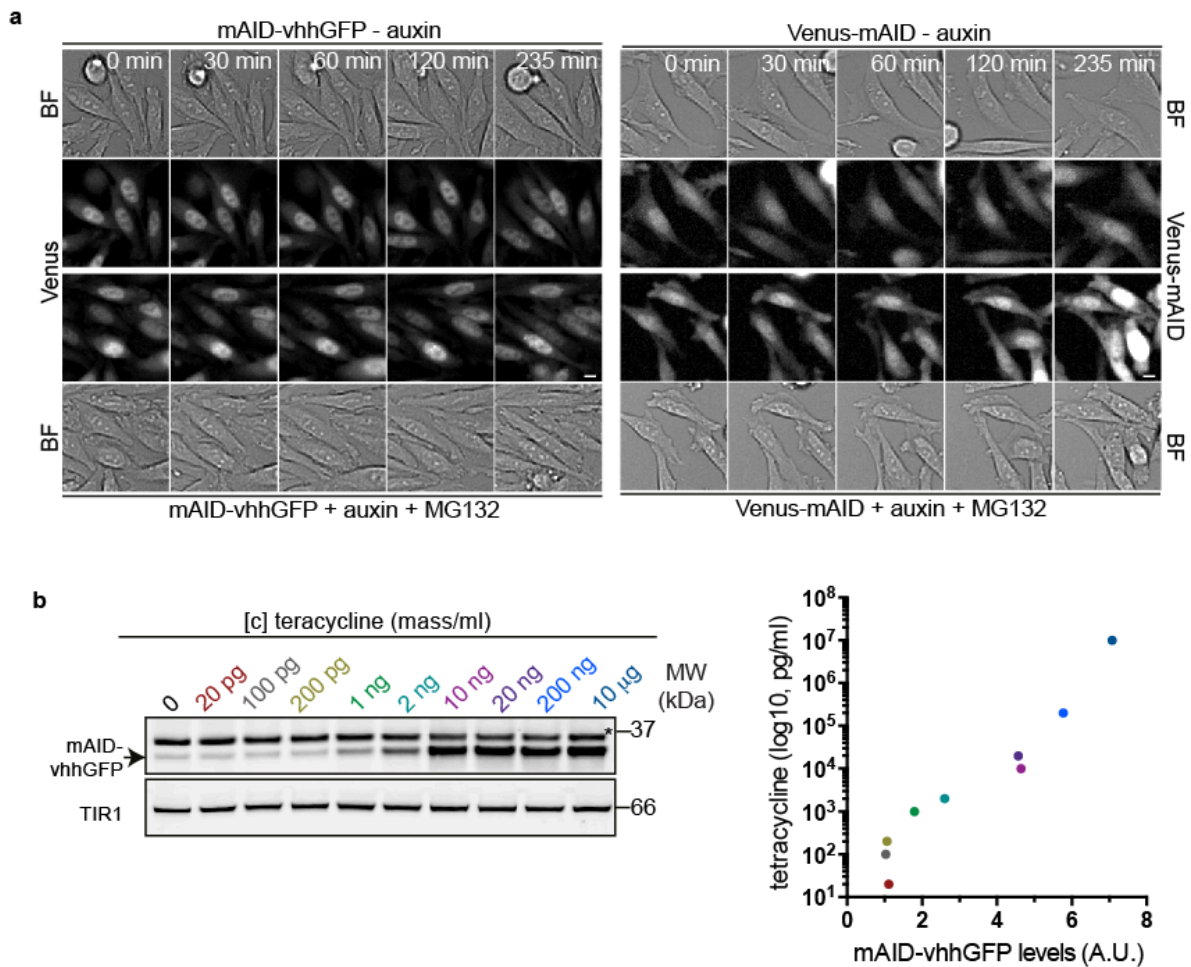

**Supplementary Figure 2 | Degradation of Venus by mAID-nanobody and AID systems and titration of mAID-nanobody expression. (a)** Time-lapse images of Venus targeted by the mAID-nanobody and of Venus-AID without auxin and in the presence of 0.5 mM auxin together with 10 µM of the proteasome inhibitor MG132. Note, the associated images with auxin addition are presented in Fig. 2. **(b)** Western blot analysis and quantification of mAID-nanobody expression in response to tetracycline titration for 24 hours in relation to the data shown in Fig. 2d. Arrow indicates the mAID-nanobody, asterisk Venus, which both bear the HA epitopes (see Methods).

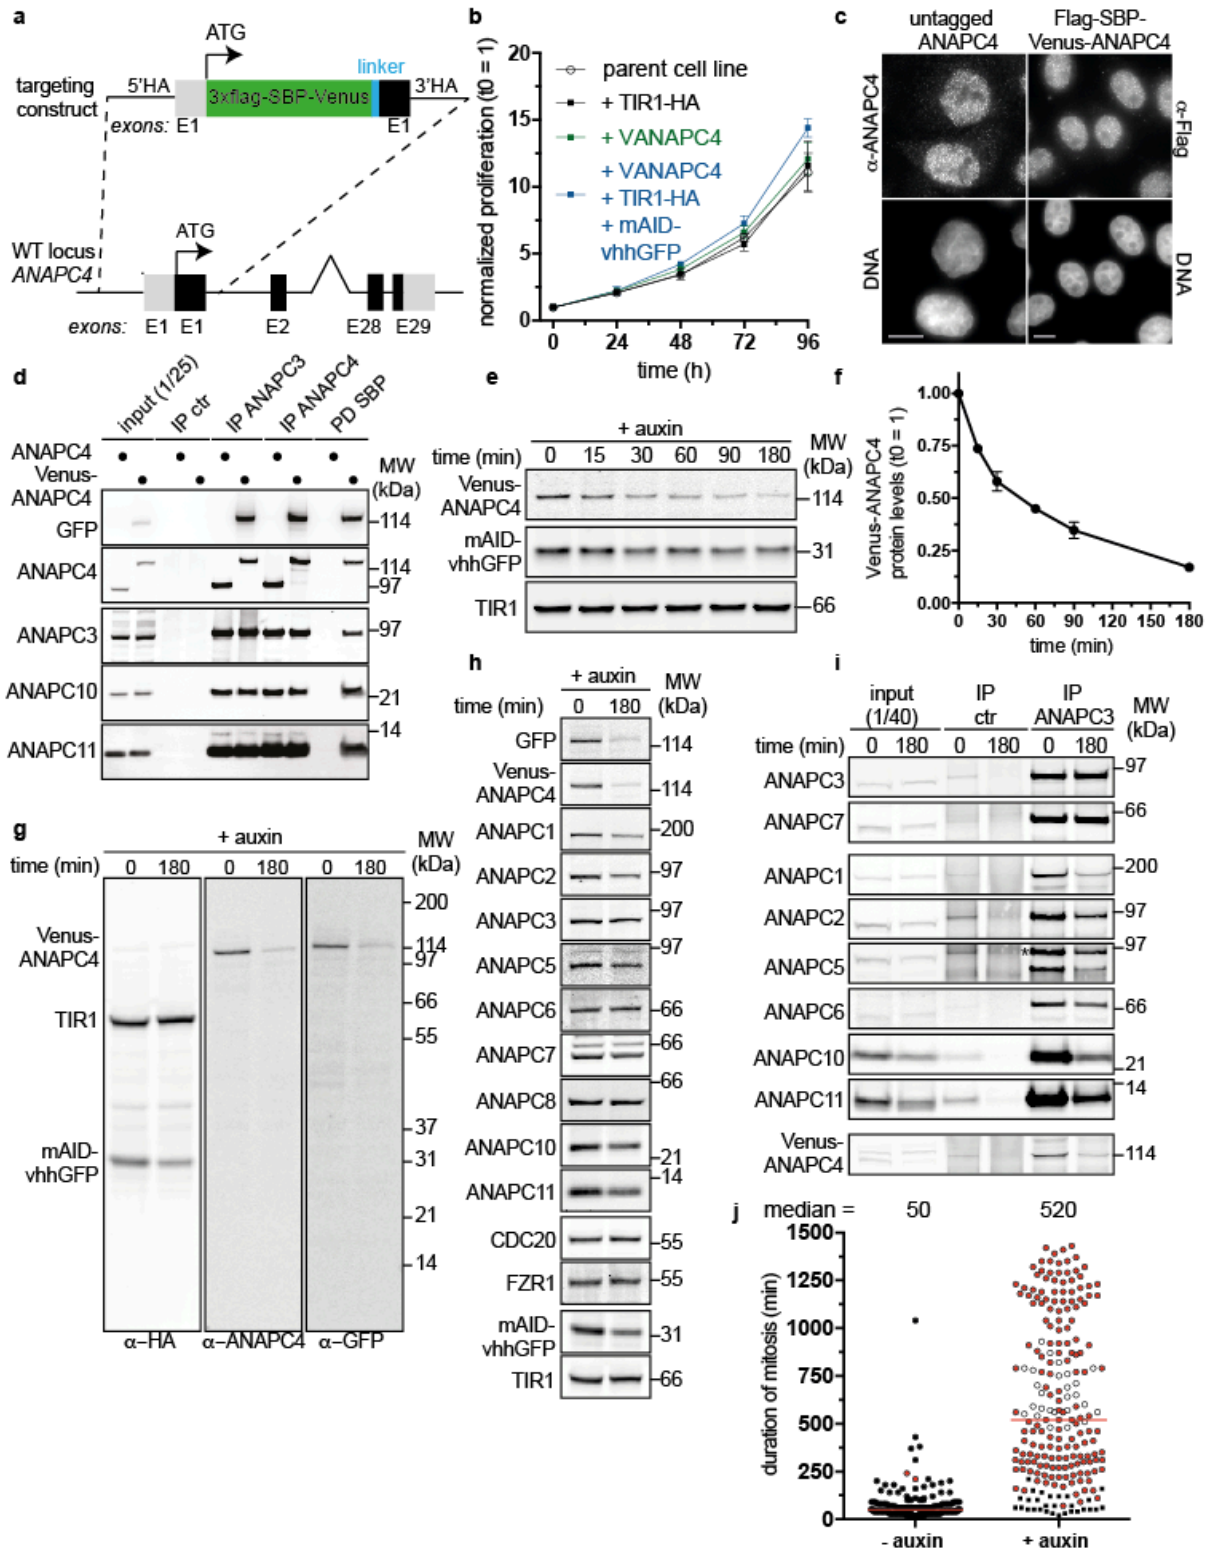

**Supplementary Figure 3 | Targeting of the endogenous *ANAPC4* locus and the effect of *ANAPC4* depletion by mAID-nanobodies on the APC/C and the duration of mitosis. (a) Targeting scheme to insert 3xFlag-SBP-Venus into *ANAPC4* loci by CRISPR/Cas9-assisted homologous recombination. (b) Proliferation analysis for the indicated time showing the behavior the parent HeLa FRT/TO cell line compared to the stable cell lines expressing TIR1, 3xFlag-SBP-Venus-ANAPC4, and TIR1 + 3xFlag-SBP-Venus-ANAPC4 + mAID-nanobodies. Data represent mean  $\pm$  s.d. ( $n \geq 4$ , all conditions). (c) Immunostaining of endogenous untagged ANAPC4 and endogenously-tagged 3xFlag-SBP-Venus-ANAPC4. Scale bar: 10  $\mu$ m. (d) Western blot analysis of ANAPC3, ANAPC4 and SBP purifications from parent (ANAPC4) and endogenously tagged (Venus-ANAPC4) cells showing the integration of Venus-ANAPC4 into the APC/C. (continued on next page)**

**(e)** Western blot analysis and quantification **(f)** of Venus-ANAPC4 levels in total lysates after the addition of auxin for the indicated time. Data represent the mean and s.e.m. determined by quantitative infra-red Western blot analysis (n=3) **(g)** Western blot analysis of showing the complete membranes detected with anti-ANAPC4 and anti-GFP antibodies after degradation of Venus-ANAPC4 after the addition of 0.5 mM IAA for 3 hours. TIR1 serves as the loading control. **(h)** Western blot analysis showing the stability of other APC/C subunits as well as APC/C co-activators CDC20 and FZR1 after depleting Venus-ANAPC4 with mAID-nanobodies for 3 hours. **(i)** Western blot analysis of control (HA) and ANAPC3 immunoprecipitations assaying APC/C integrity after depleting Venus-ANAPC4. Note, only the association with ANAPC7, a direct binder of ANAPC3 is not affected by degrading Venus-ANAPC4 indicating a partial disassembly of the APC/C holoenzyme. **(j)** Duration of mitosis determined from time-lapse experiments directly after the addition of auxin. Black circles represent cell that finished mitosis normally, open circles represent cells that remained arrested in mitosis until the end of imaging, and red circles indicate cells that underwent mitotic catastrophe after a prolonged mitotic arrest. Red lines represent the median of 202 and 221 cells from - and + auxin treatment, respectively.

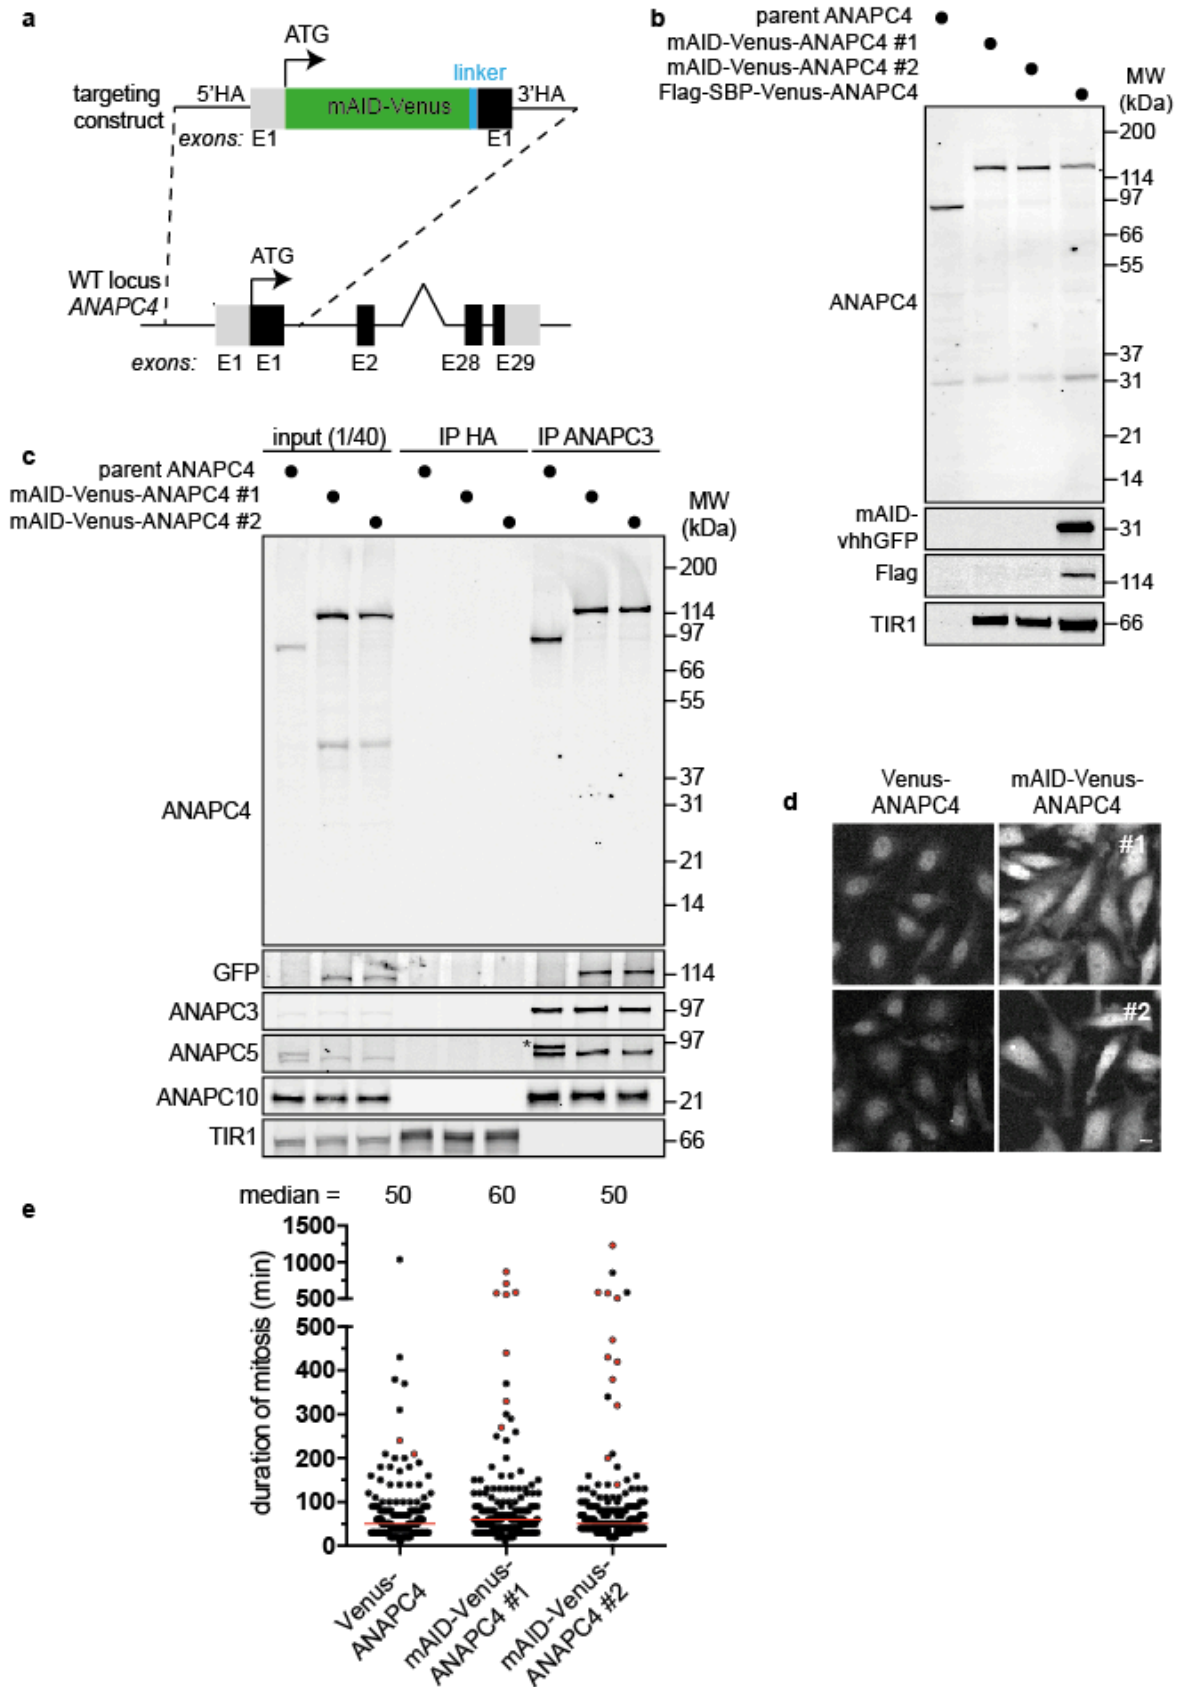

**Supplementary Figure 4 | Targeting of the endogenous *ANAPC4* locus with AID-Venus. (a)** Targeting scheme to insert AID-Venus into the *ANAPC4* locus by CRISPR/Cas9-assisted homologous recombination. **(b)** Western blot analysis of total lysates comparing the expression and molecular size of parent, Flag-SBP-Venus and AID-Venus-tagged endogenous ANAPC4.

(continued on next page)



**(c)** Western blot analysis of control (HA) and ANAPC3 immunoprecipitation showing AID-Venus-ANAPC4 incorporation into the APC/C and that the tagged allele represents almost all ANAPC4 assembled into the APC/C (see Methods for discussion of the two additional ANAPC4 alleles present in AID-Venus-ANAPC4 cell lines). **(d)** Localization of AID-Venus-ANAPC4 compared to Flag-SBP-Venus-ANAPC4 (Venus-ANAPC4) in living cells. Note, tagging of ANAPC4 with AID-Venus but not tagging with equally sized Flag-SBP-Venus reduces the nuclear enrichment of ANAPC4 compared to untagged ANAPC4 (see Supplementary Fig. 2b). Scale bar: 10  $\mu$ m. **(e)** Duration of mitosis determined from time-lapse experiments comparing cell lines expressing endogenous Flag-SBP-Venus-ANAPC4 (Venus-ANAPC4) and AID-Venus-ANAPC4. Black circles represent cells that finished mitosis normally and red circles indicate cells that underwent mitotic catastrophe after a prolonged mitotic arrest. Red lines represent the median of 202 cells for Venus-ANAPC4, of 202 cells for AID-mVenus-ANAPC4 clone #1 and of 175 cells for AID-mVenus-ANAPC4 clone #2. Note, the data for Venus-ANAPC4 are reproduced for comparison from the graph shown in Supplementary Figure 3i.

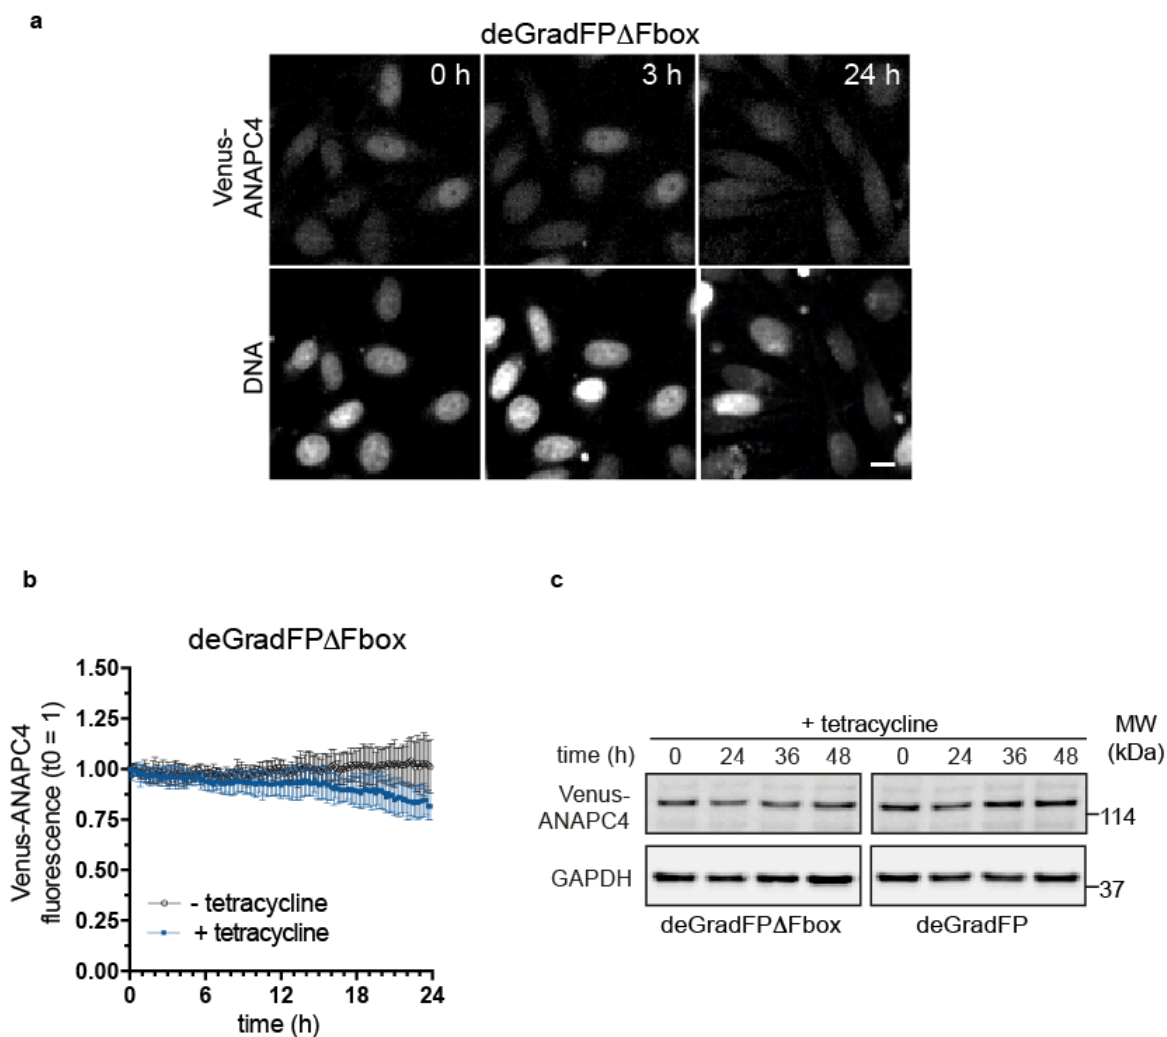

**Supplementary Figure 5| Venus-ANAPC4 stability in response to expression of deGradFP and deGradFP<sup>Fbox</sup>. (a)** Time-lapse images showing Venus fluorescence after induction of deGradFP<sup>Fbox</sup> expression with 1  $\mu$ g/ml tetracycline for the indicated time. The associated images showing degradation of Venus-ANAPC4 by deGradFP are presented in Fig. 5. Scale bar: 10  $\mu$ m. **(b)** Quantification of time-lapse shown in (a). Data represent mean  $\pm$  s.d. (n=8, - auxin; n=10, +auxin). **(c)** Western blot analysis of total lysates comparing the levels of Venus-ANAPC4 after a prolonged induction of deGradFP and deGradFP<sup>Fbox</sup> expression for the indicated time.

a

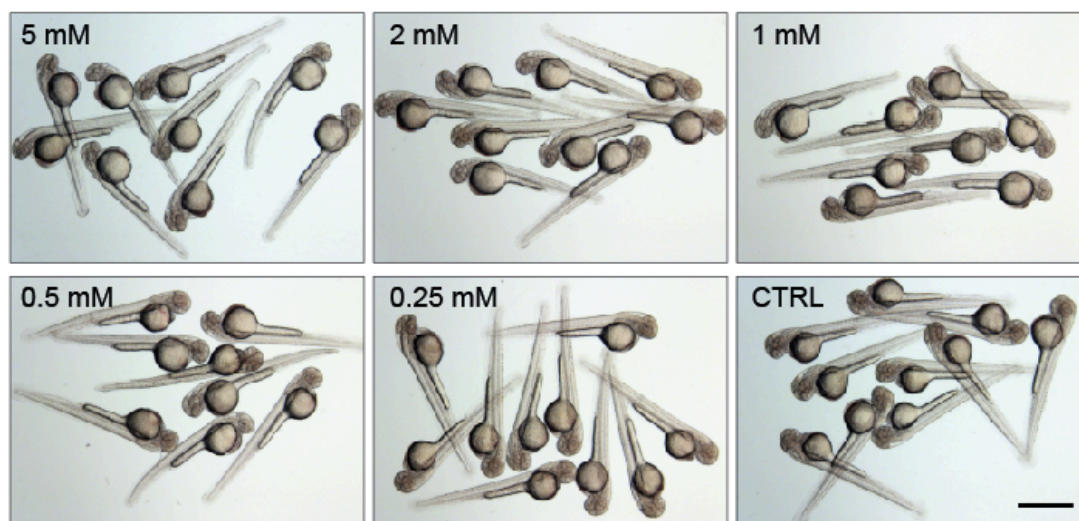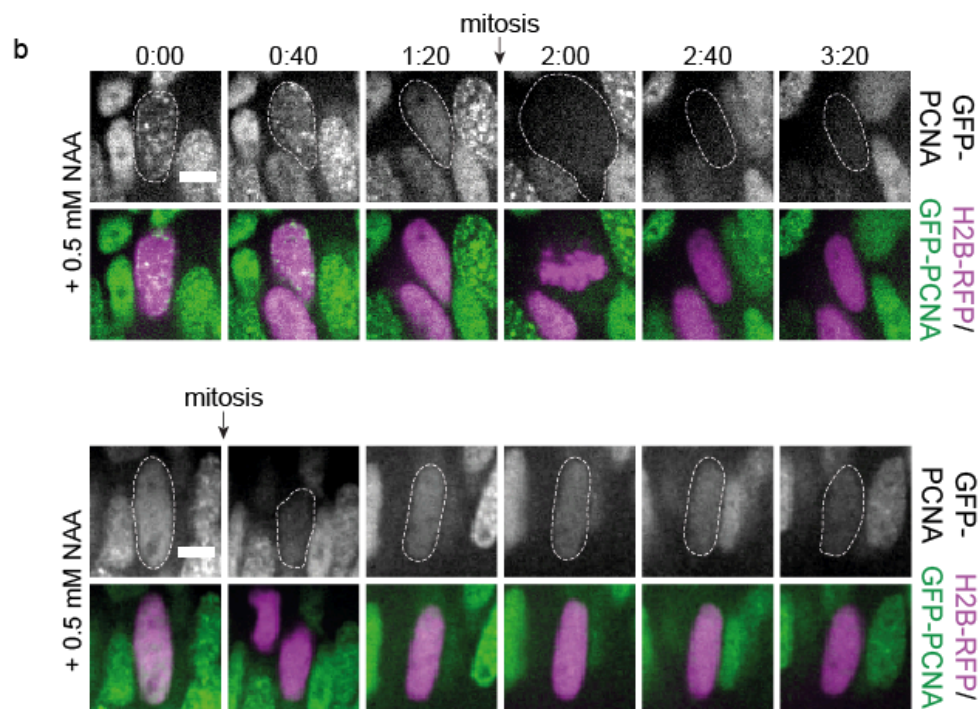

**Supplementary Figure 6| Auxin tolerance and GFP-PCNA degradation in zebrafish.** (a) Bright field images of zebrafish embryos grown in the presence of the indicated concentration of IAA until 48 hpf. Scale bar: 1 mm. (b) Time-lapse imaging of GFP-PCNA degradation in response to 0.5 mM NAA as shown in Fig. 6d. Cells with degradation system are H2B-RFP positive. Scale bar: 5  $\mu$ m.

## Methods

**Cell culture.** Parent hTERT RPE-1 FRT/TO and HeLa FRT/TO cells were a kind gift from Jonathon Pines (ICR, London, UK) and HeLa cells expressing INCENP-GFP (INCENP-LAP) from a BAC were a kind gift from Anthony Hyman (MPI-CBG, Dresden, Germany). Cells were cultured according to standard mammalian tissue culture protocols. RPE-1 (hTERT) cells were grown in DMEM/F12 (Sigma-Aldrich) supplemented with 10% (v/v) FBS, 1% (v/v) penicillin-streptomycin, 1% (v/v) Glutamax, 0.5 µg/mL Amphotericin B and sodium bicarbonate. HeLa cells were maintained in Advanced DMEM (Gibco) supplemented with 2% FBS, 1% (v/v) penicillin-streptomycin, 1% (v/v) Glutamax and 0.5 µg/mL Amphotericin B. Stable integrants were selected with 400 µg/ml neomycin (AID containing constructs) and 0.5 µg/ml puromycin (TIR1 and free GFP constructs) or 200 µg/ml hygromycin (Venus, Venus-LMNA and CCND1-Venus transgenes).

**DNA constructs.** Codon-optimization of rice TIR1 for mammalian expression has been described previously<sup>5</sup>. For creating TIR1 expressing construct a cassette of N-terminal nuclear localization signal (NLS)-TIR1-C-terminal HA-tag and N-terminal Myc-tag-nuclear export signal (NES HIV rev)-TIR1 separated by a P2A site has been inserted into a Rosa26-CAG-IRES-puro targeting vector upstream of IRES. Codon-optimization of *Arabidopsis* IAA17 degron (AID) for mammalian expression has been described previously<sup>5</sup>. For generating AID-Venus fusion constructs N-terminal triple HA-tag-Venus-AID (full length) cassette or N-terminal triple HA-tag-Venus-triple minimized AID (3x mAID) or N-terminal triple HA-tag-Venus-single minimized AID (mAID) has been inserted into the pcDNA5/FRT/TO vector (Thermo Fisher Scientific) for tetracycline inducible overexpression. The vhhGFP4 nanobody-containing tetracycline-inducible overexpression constructs have been generated by insertion of either N-terminal triple HA-tag-mAID-vhhGFP4 or N-terminal triple HA-tag-mAID<sup>K→R</sup>-vhhGFP4 or N-terminal triple HA-tag-mAID<sup>K→R</sup>-vhhGFP4<sup>K→R</sup> into pcDNA5/FRT/TO vector (Thermo Fisher Scientific).

| Sequences: | mAID                                                                                       | 65-132aa | AID |
|------------|--------------------------------------------------------------------------------------------|----------|-----|
|            | (ACPKDPAKPPAKAQVVGWPPVRSYRKNVMVSCQKSSGGPEAAAFVKVSM DGAPYLRKIDLRMYK),                       |          |     |
|            | mAID <sup>K→R</sup> (ACPRDPARPPARAQVVGWPPVRSYRRNVMVSCQRSSGGPEAAAFV RVSM DGAPYLRRIDLRMYR)   |          |     |
|            | vhhGFP4 <sup>K→R</sup> (MDQVQLVESGGALVQPGGSLRLS CAASGFVNVRYSMRWYRQAPGREREWVAGMSSAGDRSSYEDS |          |     |
|            | VRGRFTISRDDARNTVYLQMNSLRPEDTAVYYCNVNVGF EYW GQGTQVTVSS).                                   |          |     |

To visualize mAID-vhhGFP expression in transient transfection experiments the mAID-vhhGFP sequence was cloned downstream of an IRES element of CMV-driven mCherry fused at its N terminus to the N-terminal importin β binding domain (IBB) creating IBB-mCherry-IRES-mAID-vhhGFP in a pIRESpuro backbone (Thermo Fisher Scientific). LMNA was amplified from a plasmid encoding GFP-Lamin A<sup>32</sup> and cloned onto the C-terminus

of 3xHA-Venus. Flag-murine CCND1 was amplified from a CCND1-CDK2 fusion<sup>33</sup> and cloned onto the N terminus of a 3xHA-Venus-6x histidine tag. Note, residues T286 and T288 were changed to alanine by site-directed mutagenesis. All reporter constructs including Venus (3xHA-Venus-6x histidine tag) and Venus-mAID (3xHA-Venus-mAID) were cloned into a pIRESHygro3 backbone (Thermo Fisher Scientific).

To target the *ANAPC4* gene at the N-terminus with 3xFlag-SBP-Venus ~1,500 base pair long homology arms were amplified from RPE-1 (hTERT) genomic DNA using Not I 5'-ATAAGAATGCGGCCGCcttttcatctccccgttgctgctgaagcc-3' together with XhoI 5'-ccgctcgcagCAACATGGGGACGGCCctgcaacgacaccccagtcagaggccggc-3' for the left, and HindIII 5'-cccaagcttCGTTTTCCGACCTGTTTCCCATCCTTCCGGGTG-3' together with NotI 5'-ataagaatGCGGCCGCaggtcatctctacaacactcaactcc-3' oligonucleotides for the right homology arm, respectively. An XhoI-3xFlag-SBP-Venus-15-alanine-glycine-linker-HindIII fragment was amplified from synthetic DNA and cloned together with both homology arms into the NotI sites of pAAV-MCS (Stratagene). For mAID-Venus-ANAPC4 targeting the sequence encoding 3xFlag-SBP was exchanged with mAID using the EcoRI and XhoI sites present in the 3xFlag-SBP-Venus nucleotide sequence.

To generate zebrafish constructs Gateway cloning (Thermo Fisher Scientific) based on the Tol2 kit<sup>34</sup> was used. Tol2-bactin:GFP-PCNA, eGFP-PCNA middle entry clone<sup>35</sup> was combined with the beta-actin promoter 5' entry clone<sup>34</sup> and pTol2+pA R4-R2 backbone<sup>36</sup>. Tol2-bactin:GFP-LAP2b, the LAP2b 3' entry clone was created by amplifying Lap2b from pmRFP\_LAP2beta\_IRES\_puro2b (gift from Daniel Gerlich, Addgene plasmid #21047) using forward 5'-ggggacagcttctgtacaaagtgctCTGTACAAGTACTCAGATCTCGAGC-3' together with reverse 5'-ggggacaactttgtataataaagttgcTCAGTTGGATATTTTAGTATCTTGAAGAAAATTAGTG -3' oligonucleotides) followed by recombination with the beta-actin promoter 5' entry clone, GFP middle entry clone, and pTol2+pA R4-R3 backbone<sup>34</sup>. The HA-mAID<sup>K→R</sup>-vhhGFP4<sup>K→R</sup>, Flag-myc-NES-TIR1, NLS-TIR-HA and mKate2 were subcloned into pCS2+ vector for RNA production. The H2B-RFP in pCS2+ was published previously<sup>37</sup>. The plasmids and their sequences will be available from Addgene.

**Generation of cell lines.** A Neon Transfection system (Thermo Fisher Scientific) was employed to deliver DNA constructs to generate all cell lines. Stable HeLa FRT/TO and RPE-1 (hTERT) FRT/TO cell lines expressing TIR1, Venus, Venus-LMNA, CCND1-Venus were generated by random integration and selection with puromycin (0.5 µg/ml) or blasticidin (5 µg/ml). Stable clones expressing tetracycline-inducible Venus-AID and mAID-vhhGFP4 constructs were cloned into pCDNA5/FRT/TO vectors (see above) and integrated into an FRT site using the Flp-In system (Thermo Fisher Scientific) according to the manufactures instructions, followed by selection with



neomycin (400 µg/ml) and isolation of single clones. mAID-vhhGFP4 constructs were inserted into the FRT site of same single parent RPE-1 (hTERT) or HeLa clone expressing already Tir1 to ensure an isogenic background. mAID-nanobodies expression in Venus-LMNA cells was induced for 24 hours by 10-20 ng/ml tetracycline and by 1 µg/ml tetracycline for CCND1-Venus or Venus cells unless otherwise indicated. For Venus-ANAPC4 degradation the residual tetracycline in the medium was sufficient for degradation. Site-specific integration of 3×Flag-SBP-Venus into *ANAPC4* loci was facilitated by CRRISPR/Cas9-mediated homologous recombination using a gRNA targeting the N-terminus of the *ANAPC4* gene (5'-ctgactgggggtgctgttca-3'). Briefly, NLS-Flag-linker-Cas9<sup>5,38</sup> and the pAAV-3xFlag-SBP-Venus or pAAV-mAID-Venus targeting constructs (see above) were co-electroplated into HeLa FRT/TO cells followed by one week recovery and expansion of cells. Subsequently, single Venus-positive integrands were identified and sorted by flow cytometry. PCR and sequencing analyses confirmed that in the case of 3xFlag-SBP-Venus-ANAPC4 targeting all *ANAPC4* alleles were successfully targeted, whereas in the case of mAID-Venus-ANAPC4 only one out of three *ANAPC4* alleles was targeted. A second allele displayed a truncation removing the complete first exon including all potential start codons, while a third allele featured a deletion of 10 base pairs upstream of the *ANAPC4* start codon that included the acceptor splice site of the adjacent exon-intron border. Analyses of ANAPC4 levels in total lysates and of ANAPC4 incorporation into the APC/C (Supplementary Fig. 4) by Western blot suggested that the tagged allele encodes for the only ANAPC4 protein being expressed.

**Zebrafish husbandry.** Wild type strain TL (RRID:ZIRC\_ZL86) of zebrafish was used. Adult fish were maintained and bred at 26°C. Embryos were raised at 28.5°C. Embryos were incubated in E3 medium supplemented with 0.2 mM 1-phenyl-2-thiourea (Sigma-Aldrich P7629) from ~5 hours post fertilization (hpf) to prevent pigmentation. All animal work was performed in accordance with EU directive 2010/63/EU as well as the German Animal Welfare Act.

**Transgenic zebrafish lines.** The GFP-PCNA line *Tg(bactin:GFP-PCNA)*, ubiquitously expressing the GFP-tagged human proliferating cell nuclear antigen (PCNA), and the GFP-LAP2b line *Tg(bactin:GFP-LAP2b)*, ubiquitously expressing the GFP-tagged rat lamina-associated polypeptide 2 were created by injection of 1 nl of the Tol2 plasmid at 30 ng/µl together with the Tol2 RNA at 50 ng/µl into the cytoplasm of one-cell-stage embryos. F<sub>0</sub> embryos with fluorescence signal were grown to adulthood, and Tg carriers were identified by outcross with wild-type fish. The GFP-Utrophin *Tg(actb2:GFP-Hsa.UTRN)*<sup>39,40</sup>, the mls-GFP *Tg(Xla.Eef1a1:mlsEGFP)*<sup>35,41</sup> and the myosin II line *Tg(actb2:myl12.1-GFP)* were described previously<sup>42,43</sup>.

**Western blotting and APC/C purification.** HeLa cells treated with IAA for the indicated time were washed twice with PBS and directly lysed in LDS sample buffer (Thermo Fisher Scientific). APC/C was purified from asynchronously growing cells using monoclonal ANAPC3 and ANAPC4 antibodies coupled to Dynabeads (Thermo Fisher Scientific) as described previously<sup>38,42</sup>. SBP pull-downs were performed with MyOne Streptavidin T1 Dynabeads (Thermo Fisher Scientific) and beads were washed 5 times in extraction buffer (175 mM NaCl, 30 mM HEPES at pH 7.8, 2.5 mM MgCl<sub>2</sub>, 5% glycerol, 1 mM dithiothreitol, and 1 mM phenylmethyl sulphonyl fluoride) before elution with LDS sample buffer (Thermo Fisher Scientific). Proteins were separated by SDS-PAGE using 4–12% Bis-Tris gels in MES buffer and Western blotting in 20% methanol/MOPS buffer (all Thermo Fisher Scientific) in a Mini Trans-Blot electrophoretic cell (Bio-Rad), and detected with the following antibodies at the indicated dilutions: ANAPC4 (custom mouse monoclonal antibody, 1:1000, gift from Jonathon Pines, ICR London, UK), ANAPC4 (rabbit polyclonal antibody, 1:2500, Bethyl laboratories, A301-176A), ANAPC3 (custom mouse monoclonal antibody, 1:1000, gift from Jakob Nilsson, The Novo Nordisk Foundation Center for Protein Research, Copenhagen, Denmark), GFP (custom goat polyclonal antibody, 1:5000, protein facility of the Max Planck Institute of Molecular Cell Biology and Genetics, Dresden, Germany), ANAPC10 (custom rabbit polyclonal antibody, 1:2500, gift from Jonathon Pines, ICR London, UK), ANAPC11 (custom mouse monoclonal antibody, 1:1000, gift from Jonathon Pines, ICR London, UK), Cyclin A (rabbit polyclonal antibody, 1:500, Santa Cruz, C-19, RRID:AB\_631330), Cyclin B1 (mouse monoclonal antibody, 1:1000, BD Pharmingen, GNS-1, RRID:AB\_395288), GAPDH (rabbit monoclonal antibody, 1:5000, (14C10), Cell Signaling). mAID-vhhGFP and TIR1 proteins were tagged with the HA epitope (see DNA constructs) and detected with a custom mouse monoclonal anti HA antibody (1:1000). All Western blot experiments were analyzed on a quantitative infrared (IR) scanning system (Odyssey, LI-COR) using secondary antibodies coupled to IR-dyes 680LT and 800CW (LI-COR).

**RNA injection into zebrafish.** RNA was synthesized using the SP6 mMessage Machine kit (Thermo Fisher Scientific, AM1340). RNAs were diluted in double-distilled H<sub>2</sub>O supplemented with 0.05% phenol red (Sigma-Aldrich, P0290) and injected into one to two cells of 16–64 cell stage embryos to achieve mosaic expression. The injection mixture yielding the most efficient degradation contained 60 ng/μl Flag-myc-NES-TIR1 RNA, 60 ng/μl NLS-TIR1-HA, 4 ng/μl HA-mAID<sup>K→R</sup>-vhhGFP<sup>4K→R</sup> RNA and 30 ng/μl H2B-RFP or mKate2 RNA to mark the injected cells. The injected volume was 1–2 nl.

**IAA and NAA treatment.** IAA, (indole-3-acetic acid sodium salt, Sigma-Aldrich I5148) was diluted in ddH<sub>2</sub>O to make 0.5 M stock solution stored at -20°C and used for 1 month. The NAA (1-naphthaleneacetic acid sodium salt, ChemCruz, sc-296386) was diluted and used identically to IAA and kept at room temperature up to a month. Both, IAA and NAA were applied in HeLa and RPE-1 (hTERT) cell culture and zebrafish experiments in a final concentration of 0.5 mM.

If not indicated differently, in zebrafish embryos auxin treatment started at 4–5 hpf when embryos were transferred into 90 mm Petri dish containing E3 medium without methylene blue supplemented with 0.5 mM auxin, 5 mM HEPES pH 7.25 to stabilize the pH and 0.2 mM 1-phenyl-2-thiourea. Dechoriation was not necessary, auxin penetrated the chorion efficiently. The embryos were kept in the incubator at 28.5°C until 22 hpf, when they were dechorionated and fixed. Performing the experiment at 32°C did not increase the degradation efficiency. The lowest auxin concentration for effective degradation was 100 µM and embryos tolerated auxin concentrations up to 2 mM without any obvious adverse side effects.

**Immunostaining.** To analyze ANAPC4 localization cells grown on cover slides were fixed for 5 minutes in 4% paraformaldehyde (PFA), permeabilized for 5 minutes with 1dx buffer (0.1 % Triton X-100, 0.02% Sodium dodecyl sulfate (SDS) in PBS), blocked for 1 hour with 2% BSA in PBS and incubated with ANAPC4 antibodies (rabbit polyclonal antibody, 1:1000, Bethyl laboratories, A301-176A) or anti-Flag (anti-Flag, 1/1000, custom mouse monoclonal antibody) for 1 hour at room temperature. After extensive washing with PBS-T (0.1% Tween-20 in PBS) secondary antibodies (goat-anti-rabbit Alexa 488, 1:500, Thermo Fisher Scientific, A-11008 or goat-anti-mouse Alexa 594, Thermo Fisher Scientific, A11005) were applied for 1 hour in 2% BSA/PBS-T, followed by extensive washing with PBS-T, post-fixation with 4% PFA for 5 minutes and mounting of cover slides in VECTASHIELD (VECTOR laboratories, H-1000).

Embryos were fixed in 4% PFA in PBS for 4 hours at room temperature. Fixed embryos were blocked over night at 4°C in blocking solution (10% goat serum, Thermo Fisher Scientific, 16210064, 1% BSA, 0.2% Triton X-100 diluted in PBS). Samples were then incubated in blocking solution with 10 µM DRAQ5 (Thermo Fisher Scientific, 62251) for 3 days, shaking at 4°C. Before imaging, samples were extensively washed in PBS+0.2% Tween-20.

**Image acquisition.** Living HeLa and RPE-1 (hTERT) cells were imaged using an ImageXpress Micro XLS widefield screening microscope (Molecular Devices) equipped with a 20×, 0.7 NA, air objective (Nikon) and a laser-based autofocus. During the experiment, cells were maintained in a stage incubator at 37°C in a humidified atmosphere of 5% CO<sub>2</sub>. All cell lines were grown in 96-well plastic bottom plates (µclear, Greiner Bio-One). Live-

cell imaging was performed in a modified DMEM containing 10% (v/v) FBS, 1% (v/v) penicillin-streptomycin, 1% (v/v) Glutamax, and 0.5  $\mu\text{g}/\text{mL}$  Amphotericin B without phenol red and riboflavin to reduce autofluorescence<sup>39,42</sup>. For labeling of nuclei, live cell fluorogenic DNA labeling probe SiR-Hoechst (Spirochrome) was added at a final concentration of 100 nM to the cell culture medium 2 h prior imaging. Images of the cells were acquired during degradation experiments every 5-10 minutes or for recovery experiments every 20 minutes using a Spectra X light engine (Lumencor), and an sCMOS (Andor) camera with binning = 2 or 3, and filters for YFP, Cy5 and Texas Red. ANAPC4 immunostainings were acquired using a Deltavision Core Widefield deconvolution fluorescence microscope (Applied Precision Inc.) equipped with Olympus UPlanSApo 100x/1.4 or 60x/1.2 oil immersion lenses, a CoolSNAPHQ2/HQ2- ICX285 camera, and a LED-light engine (Lumencor).

Zebrafish fixed embryos imaging was performed in the LSM 780 (ZEISS) laser scanning confocal microscope using the LD C-Apochromat 40x/1.1 water immersion objective (ZEISS). The embryos were mounted on the glass-bottom dishes (MatTek Corporation) into 1% agarose diluted in E3 medium. A z stack of 30–40  $\mu\text{m}$  was acquired with 0.56 or 1  $\mu\text{m}$  steps at room temperature. Time-lapse embryo imaging on spinning disk confocal was performed as published previously<sup>35</sup>. To reduce potential phototoxicity, only a 20  $\mu\text{m}$  stack with 2  $\mu\text{m}$  steps was taken every 20 min for 4 hours with 800 ms exposure time, binning=2 and low laser powers below 5% of 75 mW.

**GFP/Venus fluorescence quantification.** Venus, Venus-ANAPC4 and AID-Venus-ANAPC4 intensities were extracted using a customized image analysis pipeline in MetaXpress (Molecular Devices). Briefly, acquired images were first flat field corrected, subjected to top-hat filtering and segmented based on SiR-Hoechst (Spirochrome) stained nuclei. Intensities from nuclear and cytoplasmic masks were background corrected and normalized to the intensity at the beginning of the experiment. Quantification of Venus-LMNA, CCND1-Venus and INCENP-GFP was performed manually on flat field and background corrected images using Fiji<sup>42</sup>. In case of INCENP-GFP 11 out of 70 cells mCherry positive cells showed no degradation and were not included for calculation of average degradation curves.

For the presentation in Fig. 4e images were smoothed with Fiji replacing each pixel with the average of its 3x3 neighborhood<sup>42</sup>. Zebrafish image quantification was performed in Fiji<sup>42</sup>. The stack was subjected to bleach correction (simple ratio) and then the average intensity of GFP-PCNA fluorescence was measured in 3.3x3.3  $\mu\text{m}$  ROI using the ROI manager in a z slice containing the central part of the nucleus. For GFP-LAP2b, a 4  $\mu\text{m}$  line was drawn along the high intensity area at the nuclear envelope and average fluorescence value was measured. The average background fluorescence was subtracted and the ratio of fluorescence in a degradation-system-

expressing cell to a neighboring control cell was calculated. Value of 1 represents no degradation and value of 0 represents complete degradation.

**Statistical methods.** Prism 6.0 (Graphpad) was used for statistics and to create graphs. Unless otherwise indicated all data are represented as mean  $\pm$  s.d. from the indicated number movies. A two-tailed Mann-Whitney U test was performed to test for significance of distribution differences. Protein half-life and degradation kinetics were determined by a non-linear regression (one-phase decay) with a least squares (ordinary) fit.

### **Data availability**

The authors declare that the data supporting the findings of this study are available within the paper and its supplementary information files. Generated plasmids, cell lines and zebrafish are available from the corresponding authors upon request.

### **Acknowledgements**

J.M. is supported by the German Research Foundation (DFG) (Emmy Noether; MA 5831/1-1) and receives funding from the European Research Council (ERC) under the European Union's Horizon 2020 research and innovation program (grant agreement no. 680042). K.D. received funding from the Maria-Reiche-Programme of the TU Dresden. C.N. is supported by the German Research Foundation (DFG) [SFB 655, A25]. We would like to thank Magdalena Gonciarz and Frank Buchholz for critically reading the manuscript, Marija Matejic, Patricia Ramos and Sylvia Schneider for creating the transgenic zebrafish lines, and acknowledge support by the Fish and Light Microscopy Facilities of the Biotec Institute and the Max Planck Institute of Molecular Cell Biology and Genetics.

### **Author contributions**

Conceptualization, J.M and K.D.; Methodology, K.D., J.I., D.M. and J.M.; Investigation, K.D., J.I., C.H. and J.M.; Writing – Original Draft, K.D., J.I., C.N. and J.M.; Writing – Revised Manuscript, K.D. and J.M.; Funding Acquisition, K.D., C.N. and J.M.; Supervision, C.N. and J.M.

### **Competing financial interests**

The authors declare no competing financial interests.



## References

1. Trost, M., Blattner, A. C. & Lehner, C. F. Regulated protein depletion by the auxin-inducible degradation system in *Drosophila melanogaster*. *Fly (Austin)* **10**, 35–46 (2016).
2. Nishimura, K., Fukagawa, T., Takisawa, H., Kakimoto, T. & Kanemaki, M. An auxin-based degron system for the rapid depletion of proteins in nonplant cells. *Nat. Methods* **6**, 917–922 (2009).
3. Holland, A. J., Fachinetti, D., Han, J. S. & Cleveland, D. W. Inducible, reversible system for the rapid and complete degradation of proteins in mammalian cells. *Proceedings of the National Academy of Sciences* **109**, E3350–7 (2012).
4. Morawska, M. & Ulrich, H. D. An expanded tool kit for the auxin-inducible degron system in budding yeast. *Yeast* **30**, 341–351 (2013).
5. Baker, O. *et al.* RAC-tagging: Recombineering And Cas9-assisted targeting for protein tagging and conditional analyses. *Sci Rep* **6**, 25529 (2016).
6. Natsume, T., Kiyomitsu, T., Saga, Y. & Kanemaki, M. T. Rapid Protein Depletion in Human Cells by Auxin-Inducible Degron Tagging with Short Homology Donors. *Cell Rep* **15**, 210–218 (2016).
7. Caussin, E., Kanca, O. & Affolter, M. Fluorescent fusion protein knockout mediated by anti-GFP nanobody. *Nat Struct Mol Biol* **19**, 117–121 (2012).
8. Rothbauer, U. *et al.* Targeting and tracing antigens in live cells with fluorescent nanobodies. *Nat. Methods* **3**, 887–889 (2006).
9. Zhang, L., Ward, J. D., Cheng, Z. & Dernburg, A. F. The auxin-inducible degradation (AID) system enables versatile conditional protein depletion in *C. elegans*. *Development* **142**, 4374–4384 (2015).
10. Saerens, D. *et al.* Identification of a universal VHH framework to graft non-canonical antigen-binding loops of camel single-domain antibodies. *J Mol Biol* **352**, 597–607 (2005).
11. Wang, S. *et al.* A toolkit for GFP-mediated tissue-specific protein degradation in *C. elegans*. *Development* **144**, 2694–2701 (2017).
12. Shin, Y. J. *et al.* Nanobody-targeted E3-ubiquitin ligase complex degrades nuclear proteins. *Sci Rep* **5**, 14269 (2015).
13. Nagarkar-Jaiswal, S. *et al.* A library of MiMICs allows tagging of genes and reversible, spatial and temporal knockdown of proteins in *Drosophila*. *Elife* **4**, (2015).
14. Morin, X., Daneman, R., Zavortink, M. & Chia, W. A protein trap strategy to detect GFP-tagged proteins expressed from their endogenous loci in *Drosophila*. *Proc Natl Acad Sci USA* **98**, 15050–15055 (2001).
15. Trinh, L. A. *et al.* A versatile gene trap to visualize and interrogate the function of the vertebrate proteome. *Genes Dev* **25**, 2306–2320 (2011).
16. Ratz, M., Testa, I., Hell, S. W. & Jakobs, S. CRISPR/Cas9-mediated endogenous protein tagging for RESOLFT super-resolution microscopy of living human cells. *Sci Rep* **5**, 9592 (2015).
17. Lackner, D. H. *et al.* A generic strategy for CRISPR-Cas9-mediated gene tagging. *Nat Commun* **6**, 10237 (2015).
18. Gookin, S. *et al.* A map of protein dynamics during cell-cycle progression and cell-cycle exit. *PLoS Biol.* **15**, e2003268 (2017).
19. Cuylen, S. *et al.* Ki-67 acts as a biological surfactant to disperse mitotic chromosomes. *Nature* **535**, 308–312 (2016).
20. Kubota, T., Nishimura, K., Kanemaki, M. T. & Donaldson, A. D. The Elg1 replication factor C-like complex functions in PCNA unloading during DNA replication. *Mol Cell* **50**, 273–280 (2013).
21. Poser, I. *et al.* BAC TransgeneOmics: a high-throughput method for exploration of protein function in mammals. *Nat. Methods* **5**, 409–415 (2008).
22. Mansfeld, J. *et al.* The conserved transmembrane nucleoporin NDC1 is required for nuclear pore complex assembly in vertebrate cells. *Mol Cell* **22**, 93–103 (2006).
23. Clift, D. *et al.* A Method for the Acute and Rapid Degradation of Endogenous Proteins. *Cell* **171**, 1692–1706.e18 (2017).
24. Neklesa, T. K. *et al.* Small-molecule hydrophobic tagging-induced degradation of HaloTag fusion proteins. *Nat. Chem. Biol.* **7**, 538–543 (2011).
25. Li, M. & Zhang, P. The function of APC/CCdh1 in cell cycle and beyond. *Cell division* **4**, 2 (2009).
26. Wirth, K. G. *et al.* Loss of the anaphase-promoting complex in quiescent cells causes unscheduled hepatocyte proliferation. *Genes Dev* **18**, 88–98 (2004).
27. Kuczera, T. *et al.* The anaphase promoting complex is required for memory function in mice. *Learn. Mem.* **18**, 49–57 (2011).
28. Sakamoto, K. M. *et al.* Protacs: chimeric molecules that target proteins to the Skp1-Cullin-F box complex for ubiquitination and degradation. *Proc Natl Acad Sci USA* **98**, 8554–8559 (2001).
29. Timney, B. L. *et al.* Simple rules for passive diffusion through the nuclear pore complex. *J Cell Biol* **215**, 57–76 (2016).
30. Hutchins, J. R. A. *et al.* Systematic analysis of human protein complexes identifies chromosome segregation proteins. *Science* **328**, 593–599 (2010).

31. Fridy, P. C. *et al.* A robust pipeline for rapid production of versatile nanobody repertoires. *Nat. Methods* **11**, 1253–1260 (2014).
32. Broers, J. L. *et al.* Dynamics of the nuclear lamina as monitored by GFP-tagged A-type lamins. *J Cell Sci* **112 (Pt 20)**, 3463–3475 (1999).
33. Chytil, A. *et al.* Construction of a cyclin D1-Cdk2 fusion protein to model the biological functions of cyclin D1-Cdk2 complexes. *J Biol Chem* **279**, 47688–47698 (2004).
34. Kwan, K. M. *et al.* The Tol2kit: a multisite gateway-based construction kit for Tol2 transposon transgenesis constructs. *Dev. Dyn.* **236**, 3088–3099 (2007).
35. Icha, J., Kunath, C., Rocha-Martins, M. & Norden, C. Independent modes of ganglion cell translocation ensure correct lamination of the zebrafish retina. *J Cell Biol* **215**, 259–275 (2016).
36. Villefranc, J. A., Amigo, J. & Lawson, N. D. Gateway compatible vectors for analysis of gene function in the zebrafish. *Dev. Dyn.* **236**, 3077–3087 (2007).
37. Norden, C., Young, S., Link, B. A. & Harris, W. A. Actomyosin is the main driver of interkinetic nuclear migration in the retina. *Cell* **138**, 1195–1208 (2009).
38. Mansfeld, J., Collin, P., Collins, M. O., Choudhary, J. S. & Pines, J. APC15 drives the turnover of MCC-CDC20 to make the spindle assembly checkpoint responsive to kinetochore attachment. *Nat Cell Biol* **13**, 1234–1243 (2011).
39. Schmitz, M. H. A. & Gerlich, D. W. Automated live microscopy to study mitotic gene function in fluorescent reporter cell lines. *Methods Mol. Biol.* **545**, 113–134 (2009).
40. Behrndt, M. *et al.* Forces driving epithelial spreading in zebrafish gastrulation. *Science* **338**, 257–260 (2012).
41. Kim, M. J., Kang, K. H., Kim, C.-H. & Choi, S.-Y. Real-time imaging of mitochondria in transgenic zebrafish expressing mitochondrially targeted GFP. *BioTechniques* **45**, 331–334 (2008).
42. Schindelin, J. *et al.* Fiji: an open-source platform for biological-image analysis. *Nat. Methods* **9**, 676–682 (2012).
43. Maître, J.-L. *et al.* Adhesion functions in cell sorting by mechanically coupling the cortices of adhering cells. *Science* **338**, 253–256 (2012).
